# 1 Live imaging of heart tube 2 development in mouse reveals 3 alternating phases of cardiac 4 differentiation and morphogenesis

5 Kenzo Ivanovitch<sup>1</sup>, Susana Temiño<sup>1</sup>, Miguel Torres<sup>1\*</sup>

\*For correspondence:  
[mtorres@cnic.es](mailto:mtorres@cnic.es) (MT)

6 <sup>1</sup>Developmental Biology Program, Centro Nacional de Investigaciones Cardiovasculares  
7 Carlos III (CNIC), Madrid

---

9 **Abstract** During vertebrate heart development two progenitor populations, first and second  
10 heart fields (FHF, SHF), sequentially contribute to longitudinal subdivisions of the heart tube (HT),  
11 with the FHF contributing the left ventricle and most of the atria, and the SHF the rest of the heart.  
12 Here we study the dynamics of cardiac differentiation by tracking individual cells in live analysis of  
13 mouse embryos. We report unexpected temporal regulation of cardiac differentiation and its  
14 coordination with heart tube morphogenesis. During an initial phase, FHF precursors differentiate  
15 rapidly to form a cardiac crescent, while limited morphogenesis takes place. In a second phase, no  
16 differentiation occurs while extensive morphogenesis results in HT formation. In a third phase,  
17 cardiac precursor differentiation resumes and contributes to SHF-derived regions and the dorsal  
18 closure of the HT. These results reveal tissue-level coordination between morphogenesis and  
19 differentiation during HT formation and provide a new framework to understand heart  
20 development

---

## 22 Introduction

23 The heart is the first organ to form and function during embryonic development. At embryonic  
24 stage (E) 7.5, cardiac precursors in the splanchnic mesoderm (mesoderm apposed to the endoderm)  
25 differentiate into cardiomyocytes by assembling the contractile sarcomere machinery (Tyser et al.,  
26 2016) and form a bilateral structure known as the cardiac crescent (cc) in the mouse. Concomitant  
27 with foregut invagination, the cc swings inwards to become placed underneath the developing head  
28 folds. By a complex morphogenetic process, the cc subsequently transforms into an early heart  
29 tube (HT) initially opened dorsally, which by E8.25 has transformed into a closed and beating linear  
30 HT also known as the primitive HT (Evans et al., 2010; Kelly et al., 2014).

31 The cc and early HT mainly give rise to the left ventricle (Zaffran et al., 2004). The right ventricle  
32 (RV), the outflow track and most of the atria derive instead from cardiac progenitors located initially  
33 dorso-medially to the cc in the splanchnic mesoderm, that are progressively recruited at the poles of  
34 the HT at subsequent developmental stages (Cai et al., 2003; Kelly et al., 2001; Mjaatvedt et al., 2001;  
35 Waldo et al., 2005). These findings led to the concept that cardiac mesodermal progenitors contain  
36 two populations of cells: the first heart field (FHF) precursors, recruited early in development to form  
37 the early HT, and the second heart field (SHF), recruited later and elongating the HT (Buckingham  
38 et al., 2005). While clonal analysis (Devine et al., 2014; Lescroart et al., 2014; Meilhac et al., 2004a)  
39 supports the idea that FHF and SHF precursors are two independent developmental fields with

40 dedicated molecular pathways, the existence of a common precursor was also reported in the early  
41 mouse embryo (Meilhac et al., 2004a). Other views suggest that the heart forms by a continuous  
42 differentiation process from a single population of cardiac precursors and only timing of recruitment  
43 distinguish cells of the FHF and SHF (Abu-Issa et al., 2004; Moorman et al., 2007). In support of the  
44 latter, typical markers of the SHF, like *Isl1* (Cai et al., 2003) are also expressed transiently in FHF  
45 precursors and must therefore be considered as pan-differentiation markers instead (Cai et al.,  
46 2003; Prall et al., 2007; Yuan and Schoenwolf, 2000). Whether the recruitment of cardiomyocytes  
47 from progenitors is a continuous process however has not been directly studied. This is partly  
48 because the spatial arrangement of progenitors and differentiated cardiomyocytes has so far been  
49 analysed on fixed embryos (Cai et al., 2003; Spater et al., 2013) and the expression dynamics of  
50 genes reporting differentiation together with cell movements during HT morphogenesis have not  
51 been captured so far (Abu-Issa, 2014).

52 Here, we report the live-imaging and 4D cell tracking of HT formation in whole mouse embryo.  
53 Using this method, in conjunction with an *Nkx2.5*GFP reporter line, characterised by a high level of  
54 GFP in differentiated cardiomyocytes as compared to undifferentiated progenitors, we studied the  
55 dynamics of cardiac field differentiation. During an initial phase, FHF cardiac precursors differentiate  
56 rapidly to form a cardiac crescent, while limited morphogenesis takes place. During a second phase,  
57 no differentiation events are detected, while extensive morphogenesis results in HT formation.  
58 Finally, using an *Isl1*-Cre lineage tracing assay combined with live-imaging, we show that during  
59 a third phase, cardiac precursor differentiation resumes and contributes not only to the known  
60 SHF-derived regions but also to the dorsal aspect of the HT. These results show essential properties  
61 of FHF and SHF contribution to heart development and reveal tissue-level coordination between  
62 alternating phases of morphogenesis and differentiation during HT formation.

## 63 Results

### 64 3D static analysis of mouse HT formation

65 To assess how the initial cardiogenic region transforms into a HT and differentiates, we first analysed  
66 whole mouse embryos immunostained against cTnnT at successive embryonic stages. Figure 1-  
67 figure supplement-1 schematises the criteria for embryo staging (Downs and Davies, 1993; Kirstie A.  
68 Lawson, 2016). Cardiac troponin T (cTnnT) is one of the first evident sarcomeric proteins to appear  
69 in the cardiac crescent (Tyser et al., 2016). At early head fold stage (EHF, E7.5), the cardiogenic  
70 region is visualised in *Nkx2.5*<sup>cre</sup><sup>+/−</sup> *R26tdtomato*<sup>+/−</sup> embryos, where both cardiac precursors and  
71 cardiomyocytes express Cre (Stanley et al., 2002). The *tdtomato*<sup>+</sup> region in these embryos forms a  
72 flat horse shoe-shaped mesodermal layer at the rostral border of the embryo (Figure 1A,A', Video 1).  
73 At this stage, cTnnT protein is not yet detected (Figure 1B), although in some embryos weak cTnnT  
74 localisation in subsets of cells can be occasionally visualised (Figure 1-figure supplement 2A,A'). At a  
75 subsequent embryonic stage (E7.7), cTnnT signal reveals the cc, which is folding inwards. During  
76 folding, the cTnnT signal increases and cTnnT<sup>+</sup> cardiomyocytes switch from a columnar epithelial  
77 shape to a rounded shape (Linask et al., 1997) (Figure 1C,D and Figure 1-figure supplement 2B,B')  
78 and separate from the endoderm, while maintaining a basal lamina at the endocardial side (inset  
79 in Figure 1D and Fig2. D). Morphogenetic changes starting at E8 subsequently lead to the initial  
80 formation of a hemitube whose major axis is transversal to the embryo A-P axis. We will refer to  
81 this stage as transversal HT (Figure 1E). Later, the tube adopts a more spherical shape very similar  
82 to the linear HT but still open dorsally. We will refer to this stage as open HT (Figure 1F). The HT  
83 eventually closes dorsally (Figure 1G, red arrows in Figure 1G'') and a prominent outflow (OFT, the  
84 prospective RV) (Zaffran et al., 2004) becomes visible (yellow arrows in Figure 1G'', Figure 1H, see  
85 also Video 2), completing linear HT formation at E8.25.

86 To assess the overall growth of the forming HT, we measured cTnnT<sup>+</sup> tissue volume in segmented  
87 z-stacks, at the stages described above (Figure 1I and Figure 1-source data 1). During the first phase  
88 of cardiomyocyte differentiation, the cTnnT signal expands resulting in a cardiac crescent rapidly

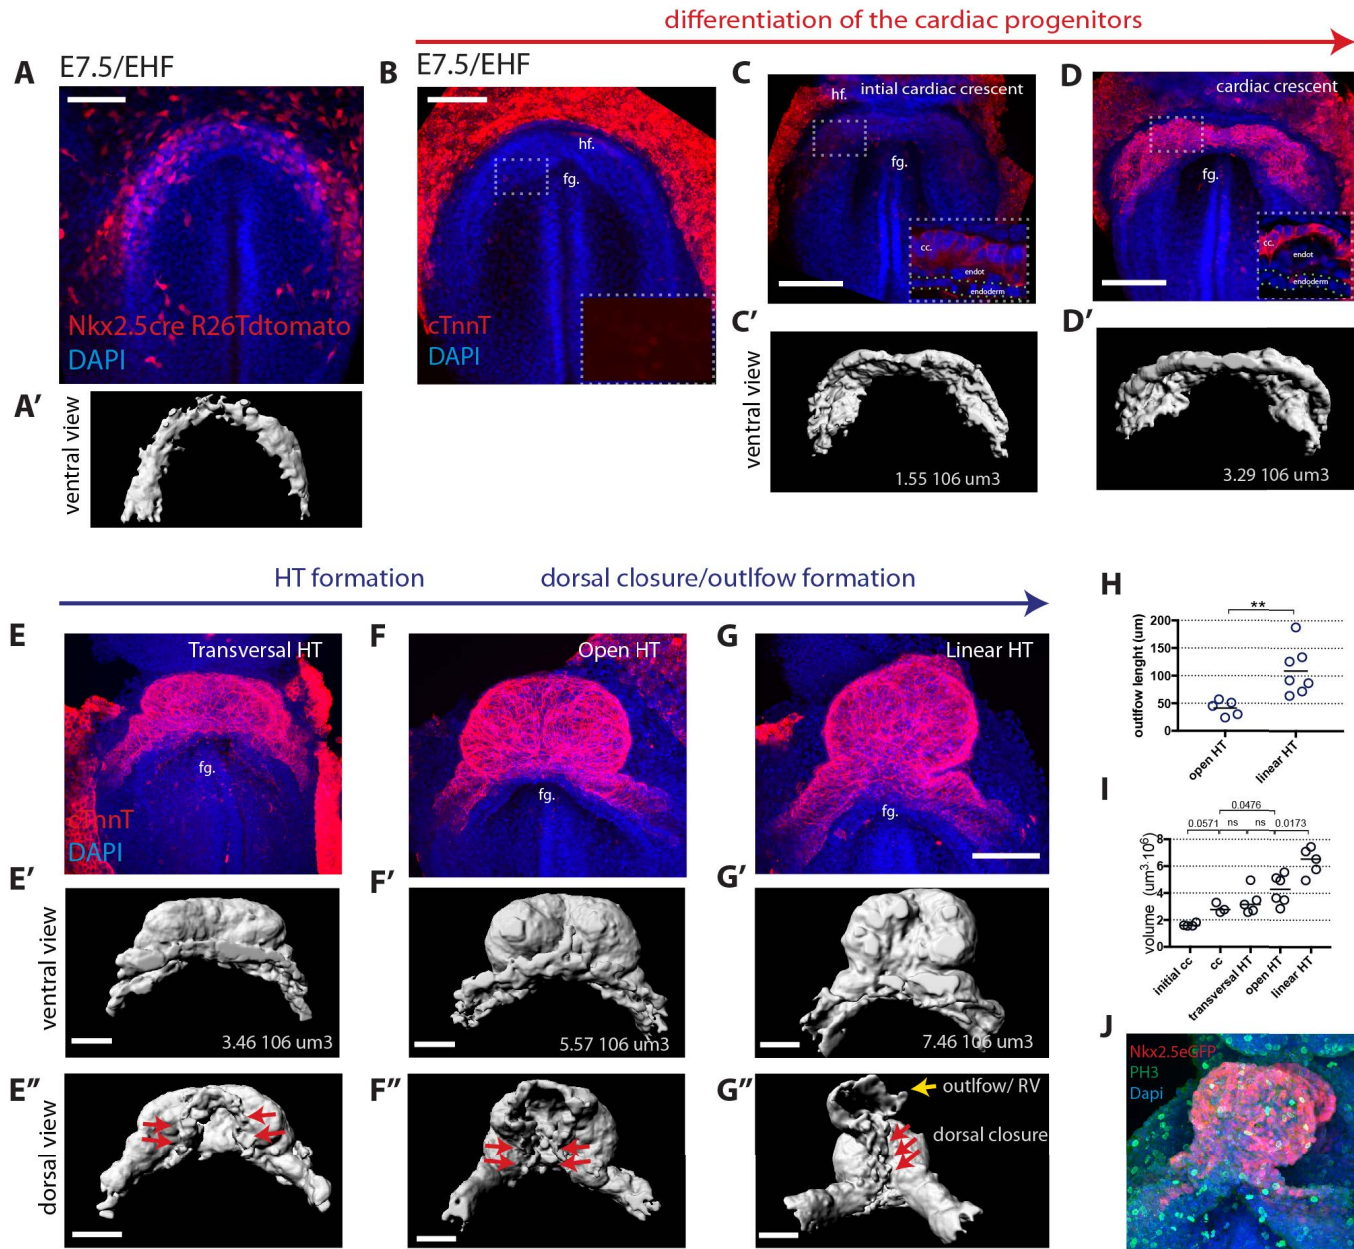

**Figure 1.** Overview of HT morphogenesis and growth. (A) Nkx2.5cre/+; R26tdtomato embryo at EHF stage. (A') 3D reconstruction. Signal from tdtomato+ endothelial cells identified by shape was manually masked. See also Video 1. (B-G) Immunostaining for cTnnT (red) and Dapi (blue) showing six consecutive stages during cardiac differentiation (B-D) and HT morphogenesis (E-G). (BB) At EHF cTnnT is initially not detectable. (C-D) During early somitogenesis, cTnnT signal in the cc becomes detectable. Insets in (B-D): magnification in single optical sections showing cTnnT localization and cell shape. (C'-G' and E''-G'') Corresponding 3D renderings from cTnnT signal reconstruction. Red arrows in (E''-G'') highlight the dorsal closure of the HT. Yellow arrow in G'' highlights the outflow (prospective RV). See also Video 2. (H) Quantification of the outflow track/RV length in the HT ( $41.4 \pm 14.0 \mu\text{m}$ , n=5) and after ( $109 \pm 43.44 \mu\text{m}$ , n=7) dorsal closure, mean  $\pm$  SD, p=0.0025. (I) Quantification of the volume at the different stages of HT development. (Initial cc:  $1.63.106 \mu\text{m}^3 \pm 0.13$ , n=4, cc:  $2.89.106 \pm 0.37 \mu\text{m}^3$ , n=3, transversal HT:  $3.367.106 \mu\text{m}^3 \pm 0.95$ , n=5, open HT:  $4.29.106 \mu\text{m}^3 \pm 1.08$ , n=6, linear HT:  $6.37.106 \mu\text{m}^3 \pm 1.01$ , n=5, mean  $\pm$  SD). P-values are indicated on the graph. (J) Immunostaining of an Nkx2.5eGFP embryo against PH3 (red) and Dapi (blue) at HT stage, showing proliferative cells in the ventricle. fg: foregut, endo: endoderm, endoc: endocardium. Scale bars: 150  $\mu\text{m}$ .

**Figure 1-Figure supplement 1.** Criteria for staging Embryos.

**Figure 1-Figure supplement 2.** Faint cTnnT signal starts to be detected at EHF stage in apico-basally polarised cc cells.

**Figure 1-source data 1.**

89 doubling in volume (Figure 1C',D',I). During the subsequent phase of morphogenesis, from cc to  
90 open HT stage, growth is less pronounced despite extensive morphological changes (Figure 1E',F',I).  
91 Volume of the HT appears to increase again upon OFT addition and dorsal HT closure (Figure 1G',I).  
92 HT growth likely reflects an increase in cell number occurring during the formation of the heart  
93 tube. The cardiomyocytes are proliferative at this stage (de Boer et al., 2012), and we can indeed  
94 observe mitotic figures in the HT (Figure 1J). From this analysis, it is however unclear how much of  
95 the growth observed is due to cardiomyocyte proliferation versus addition of new cardiomyocytes  
96 from cardiac progenitor cells located in the splanchnic mesoderm.

### 97 **3D analysis of cardiac progenitor differentiation**

98 To visualise the boundary where cardiac progenitors abut differentiating cardiomyocytes during HT  
99 morphogenesis, we immunostained *Nkx2.5cre<sup>+</sup>/-* *R26tdtomato<sup>+</sup>/-* embryos with the differentiation  
100 marker cTnnT (Figure 2A). We acquired whole-mount images at transversal HT stage and rendered  
101 the *Nkx2.5* lineage and the cTnnT<sup>+</sup> tissues in 3D allowing visualising the boundary between cardiac  
102 progenitors and differentiated cardiomyocytes at tissue level (Figure 2A,B,B' and Video 3). While  
103 cardiomyocytes are separated from the endoderm by the endocardium, undifferentiated cardiac  
104 precursors lie medio-dorsally and remain in contact with the endoderm (Figure 1A',A"). The cell  
105 shape of progenitors and cardiomyocytes is also distinct. Membrane-GFP marking of single cells  
106 shows that cTnnT<sup>-</sup> progenitors have epithelial-like columnar cell shape while the differentiated  
107 cTnnT<sup>+</sup> cardiomyocytes are rounder and lost the columnar epithelial organisation (Figure 2C-E and  
108 Figure 2-source data 1). This is reminiscent of the cell shape transition observed in the distal outflow  
109 track at later stages of heart development, when SHF progenitor-to-cardiomyocyte differentiation  
110 takes place (Francou et al., 2014; Ramsbottom et al., 2014; Sinha et al., 2012). Interestingly, some  
111 cells within the boundary zone exhibit weak cTnnT localisation and yet show columnar shapes  
112 typical of mesodermal cardiac precursors (Figure 2F-F'" and red arrows in Figure 2F'",F'"'). Since  
113 these cells do not show rounded shapes, as differentiated cardiomyocytes do, they may represent  
114 a transient state between progenitors and differentiated cardiomyocytes, however, the nature of  
115 such state cannot be addressed by static analysis. Differentiation of cardiac progenitors is thus  
116 accompanied by changes in cell shape and detachment from the endoderm.

117 We next assessed the expression pattern of the *Nkx2.5eGFP* enhancer reporter line, in which GFP  
118 is expressed in cardiomyocytes (Lien et al., 1999) (Wu et al., 2006). We immunostained *Nkx2.5eGFP*  
119 embryos against cTnnT, (Figure 3A,B and Figure 3- figure supplement 1A,B) and compared the  
120 relative intensities between cTnnT and GFP within single cells segmented manually (Figure 3C,D  
121 Figure 3- figure supplement 2A and Figure 3-source data 1). We found variable GFP level within both  
122 populations of cTnnT<sup>+</sup> and cTnnT<sup>-</sup> cells. However, the top 50% cells with the highest GFP level were  
123 systematically positive for cTnnT<sup>+</sup> (, Figure 3-source data 1) while cells with lower level of GFP were  
124 instead either positive or negative for cTnnT, and GFP level varied linearly with cTnnT level (Figure  
125 2D). This confirms a previous report showing that *Nkx2.5GFP<sup>+</sup>* differentiated cardiomyocytes were  
126 characterised by 5-fold higher mean levels of *Nkx2.5GFP* compared to SHF subpopulations in an  
127 *Nkx2.5GFP* knock-in mouse model (Prall et al., 2007) (Biben et al., 2000). However, cells expressing  
128 low level of GFP could also be cTnnT-positive, consistent with studies showing that SHF progenitors  
129 can contribute to the myocardium in the absence of *Nkx2.5* expression (Christoffels et al., 2006).  
130 Genetic tracing experiments using the *Nkx2.5-Cre Rosa26R-tdtomato* line instead shows strong  
131 *tdtomato* level in both the FHF and SHF (Figure 3- figure supplement 3A). We next imaged the  
132 boundary between cardiomyocytes and cardiac precursors in transversal HT stage embryos. We  
133 measured mean fluorescent intensity in manually segmented cells at the boundary zone and found  
134 that an increase in GFP level correlates with the onset of detectable cTnnT localisation (Figure 3B',E,  
135 Figure 3- figure supplement 2B,C and Figure 3-source data 1). Altogether, these results indicate  
136 that the *Nkx2.5-eGFP* reporter is suitable for tracking cardiomyocytes in live-imaging and reliably  
137 identifies the top 50% GFP-expressing cells as cTnnT-positive.

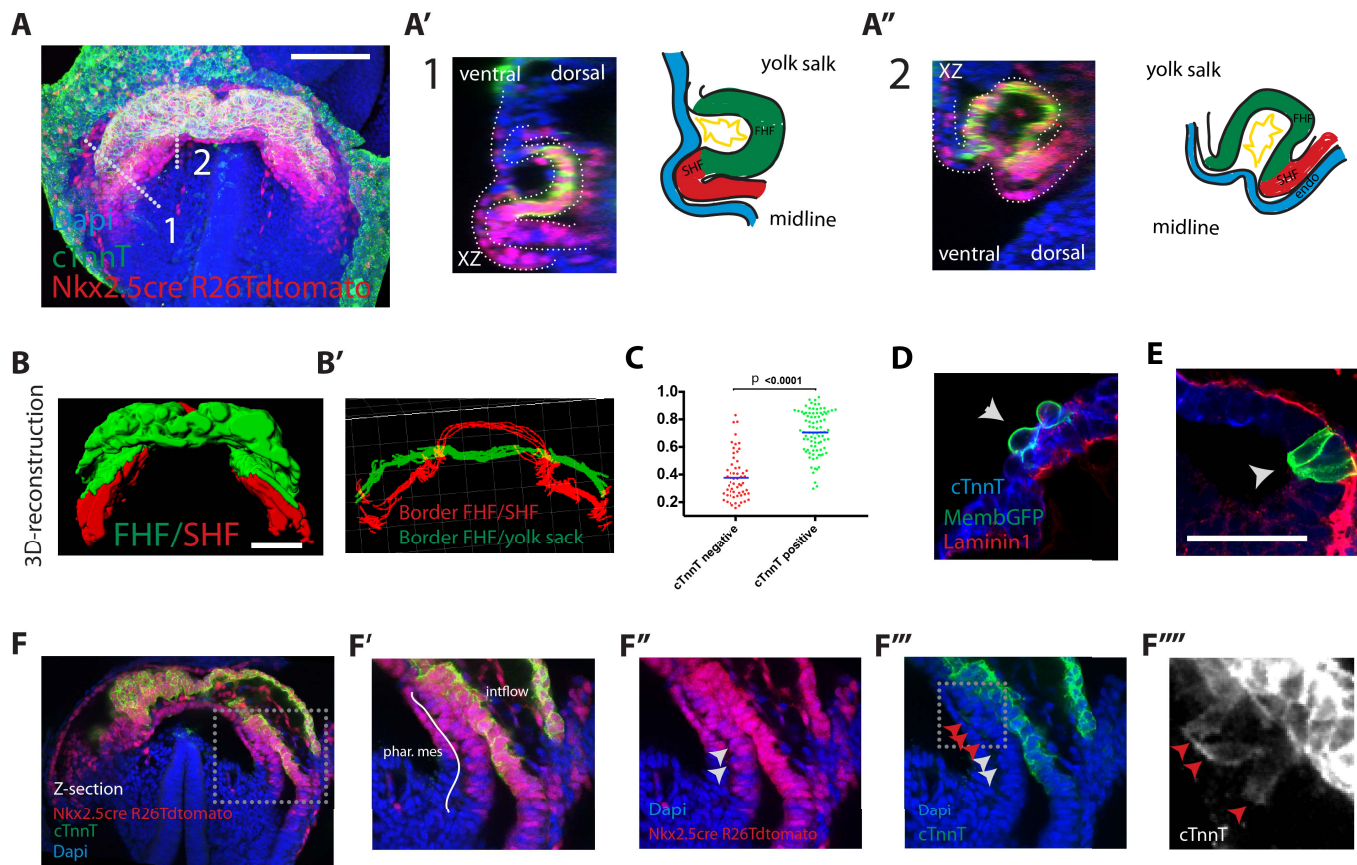

**Figure 2.** Visualisation of the boundary between FHF and SHF. (A-A'') Nkx2.5cre/+; R26tdtomato embryo immunostained for cTnnT (green) and Dapi (blue) showing cells of the Nkx2.5 lineage populating both the FHF and SHF. (A' and A'') Cross-sections in xz along the dotted lines 1 and 2 shown in (A), and corresponding schematics highlighting the endoderm (bleu), FHF (green), SHF (red) and endocardium (yellow). (B) 3D reconstruction of the FHF (green) and SHF (red); (B') 3D drawing of the border between the FHF and SHF (in red) and the FHF and yolk sack (in green) (based on the embryo shown in (A)). For SHF rendering, the tdtomato+ splanchnic mesoderm was depicted. The FHF was rendered using the cTnnT signal. See also Video 3. (C) Quantification of the cell roundness (rnd) index of cardiomyocytes at HT stage on single optical sections. Black bars indicate mean. Rnd index for cTnnT+ (green) cells is  $0.71 \pm 0.16$  and for cTnnT- (red) cells is  $0.38 \pm 0.16$ , mean  $\pm$  SD, p value  $< 0.0001$ . (D-E) Membrane-GFP labelling of typical cTnnT+ FHF (D) and cTnnT-SHF (E) cells at longitudinal HT stage. Embryo is immunostained for cTnnT (blue), the basement membrane marker Laminin1 (red) and GFP (green). (F) Single optical section of the same embryo shown in (k). (F'-F''') Inset: red arrows point to cells localizing weak cTnnT signal and have columnar cell shape in the SHF. White arrows point to cTnnT-negative SHF cells. In all the embryos immunostained for cTnnT, the yolk sack signal is background. Scale bars: 100  $\mu$ m except in (D-E): 50  $\mu$ m.

**Figure 2-source data 1.**

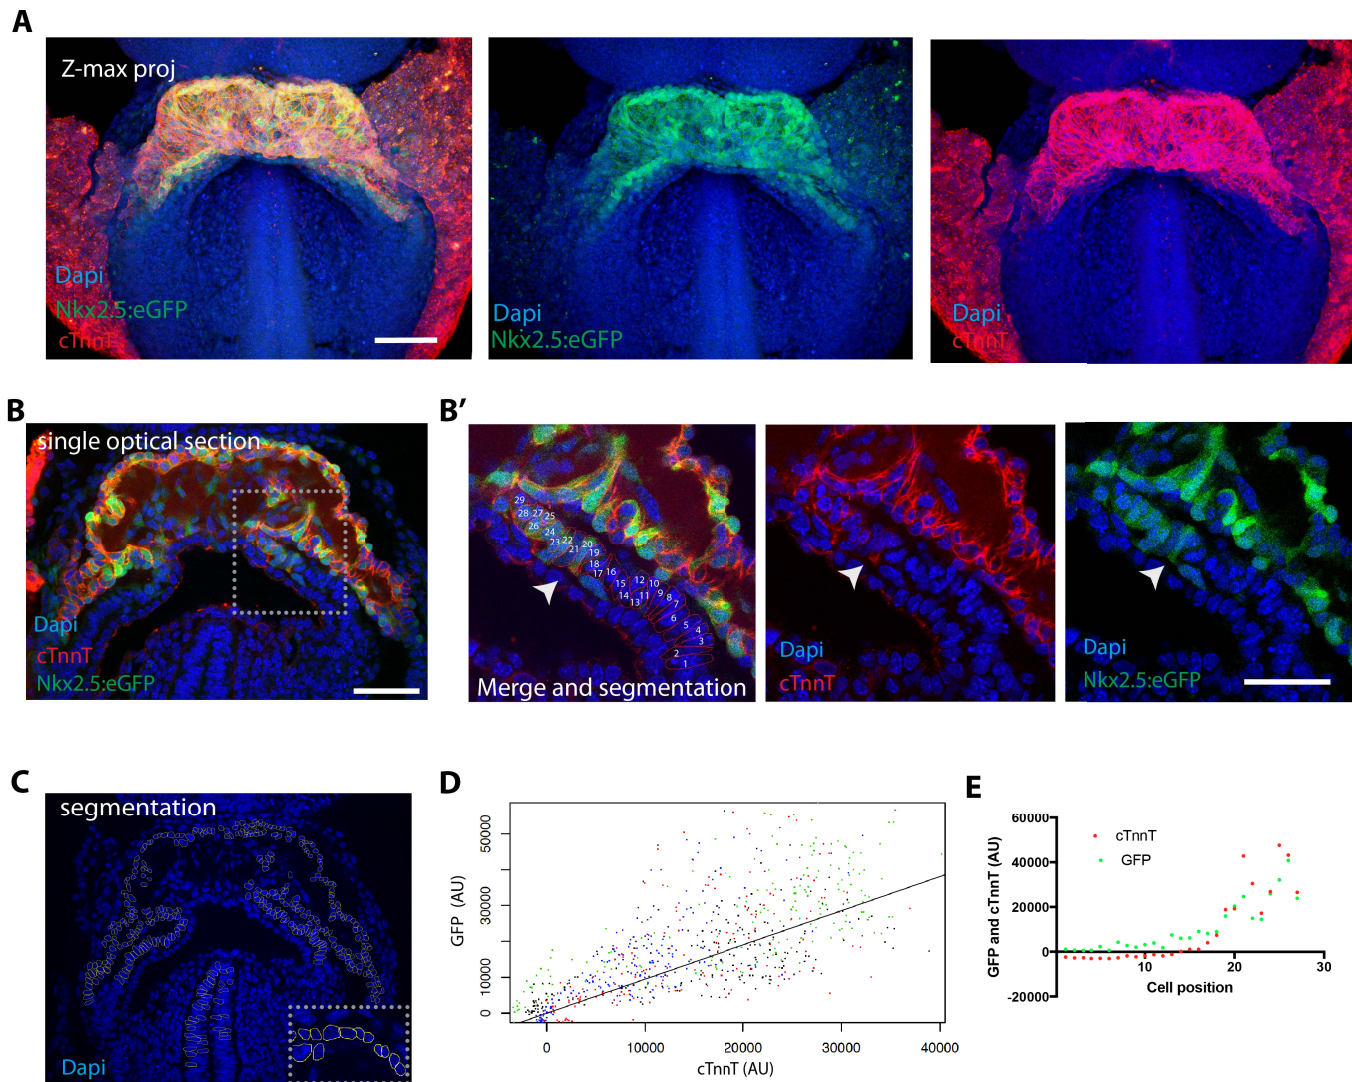

**Figure 3.** (A) z-maximum projection of an Nkx2.5eGFP embryo at transversal HT stage immunostained for cTnnT (red) and Dapi (blue) showing high GFP level in differentiated cardiomyocytes. (B) Single optical section of an Nkx2.5eGFP embryo at transversal HT stage immunostained for cTnnT (red) and Dapi (blue). (B') Inset in (B): arrow points the transition between cTnnT+ and cTnnT- domains, corresponding to FHF and SHF, respectively. Cells are manually segmented and labeled along the boundary from cTnnT-negative SHF to cTnnT-positive FHF. (C) Example of manual segmentation based on Dapi nuclei in cells located in the splanchnic mesoderm, myocardium and neural tube. (D) Linear mixed-effects model to find the relationship between the background subtracted GFP and cTnnT levels adjusted by embryo ( $GFP=0.95*cTnnT$ ,  $R^2=0.81$ ,  $p=2.2e-16$ ) ( $n=762$  cells analysed from 4 embryos). (E) GFP and cTnnT mean intensities measured within manually segmented cells along the boundary from cTnnT-negative SHF to cTnnT-positive FHF (B'). Scale bars: 100  $\mu$ m.

**Figure 3-Figure supplement 1.** The Nkx.2.5eGFP and cTnnT labelling at different z-level.

**Figure 3-Figure supplement 2.** High GFP levels are detected in cTnnT-positive cells.

**Figure 3-Figure supplement 3.** Nkx2.5Cre genetic tracing labels both the FHF and SHF

**Figure 3-source data 1.**

## 138 **2-photon live-imaging of early cardiac development in the mouse embryo**

139 We next established a live-imaging method to dynamically characterize the formation of the HT  
140 in the mouse embryo (Figure 4A) (Chen et al., 2014). We adapted a previously reported culture  
141 system (Nonaka, 2009; Nonaka et al., 2002) in which the whole mouse embryo is immobilised by  
142 inserting the extraembryonic region in a holder (Figure 4C). After culture, embryos showed normal  
143 morphology, their hearts were beating and circulation was initiated (Figure 4D,E and Figure 4-figure  
144 supplement 1A and Video 4). This culture system in combination with multi-photon microscopy  
145 enabled to generate high-resolution 4D movies (Figure 3B and see Methods and Materials).

146 Imaging *Mesp1cre/+; R26mtdtomato* embryos allowed imaging the whole mesoderm (Saga  
147 et al., 1996; Saga et al., 1999) in 3D including all cardiac lineages from cc stage up to HT stage  
148 (Figure 4F,F' and Videos 5-6). It provided information on the formation of the endocardial lumen  
149 (Figure 4F") and on the anterior movement of the splanchnic mesoderm that is coincident to the  
150 folding of the cardiac crescent into an hemi-tube (white arrows in Figure 4F). Imaging *Nkx2.5cre/+;*  
151 *R26mtdtomato/mGFP* embryos, in which both precursors and differentiated cardiomyocytes are  
152 labelled, enabled to track cells during differentiation as they transit from a columnar to a round  
153 shape and start contracting (Figure 4G-G" and Videos 7-8).

154 We next tracked cardiac differentiation using the *Nkx2.5eGFP* live reporter. At E7/bud stage  
155 (see Figure 1-figure supplement 1 for staging criteria (Kirstie A. Lawson, 2016)), faint and scattered  
156 GFP signal is detected in proximity to the yolk sack, at the anterior border of the embryo (Figure  
157 4-figure supplement 1A). At neural plate stage, just prior to the ventral folding of the embryo, the  
158 GFP signal remains weak but spreads to delineate a crescent in the anterior region of the embryo  
159 (Figure 4-figure supplement 1A and Video 9). From EHF, the GFP signal increases in intensity in  
160 correlation with the observation that *cTnnT* signal increases from this stage (Figure 4H, Figure 1C  
161 and Video 10). From transversal to open HT and closed HT stage, the GFP signal remains stable  
162 (Figure 4-figure supplement 1B,C and Video 11). We conclude that an increase in GFP level in the  
163 *Nkx2.5eGFP* transgenic reports cardiomyocyte differentiation. In addition, these results reveal the  
164 timing of the main phases of linear HT development; cc differentiation, formation of the open HT  
165 and dorsal closure (Figure 4I).

## 166 **Live tracking of Cardiomyocyte differentiation in individual cells reveals cardiac 167 crescent differentiation dynamics**

168 We next sought to track the trajectories and differentiation of individual cardiac precursors within  
169 the entire cardiogenic region by 3D live-imaging. To this end, we used the RERT allele (Guerra et al.,  
170 2003), which provides ubiquitous tamoxifen-inducible Cre activity in combination with a *Rosa26R-*  
171 *tdtomato* reporter. We then titrated the tamoxifen dose for a labelling density that would allow  
172 single cell tracking during prolonged time-lapse analysis and combined this with the *Nkx2.5eGFP*  
173 reporter (see Methods and Materials). Typically, for each movie, we acquired z-slices every 3-5µm  
174 achieving a total z-dimension of 200-300µm -depending on the stage considered- and manually  
175 tracked in 3D for several hours an initial 50 to 100 cells per movie, which represents around 10%  
176 of the total number of cells present in the cc (de Boer et al., 2012).

177 We first tracked cells of the cardiac forming region from EHF stage -when cardiac precursors are  
178 undifferentiated- up to stages in which cardiomyocytes have differentiated in the cc but have not  
179 reached the transversal HT stage yet (Figure 5A and Figure 5-source data 1). During the onset of  
180 cardiac differentiation, the cardiac crescent folds ventrally and we found that the relative positions  
181 of the cardiac progenitors are maintained from the initial stage through the differentiated cc (Video  
182 12). Relative cell positions therefore remain mostly coherent as the embryonic tissues undergo  
183 this initial global movement. Differentiation events are detected in some of the tracked cells by cell  
184 shape change from columnar to round and by the increase in GFP signal (see example in Figure 5B,D  
185 and Figure 5-source data 1). In contrast, other tracked cells remain in contact with the endoderm,  
186 retain their initial shape and show low GFP level throughout the movies. Next, in order to establish  
187 a fate map of the cardiac forming region at the EHF stage we tracked back in time the population of

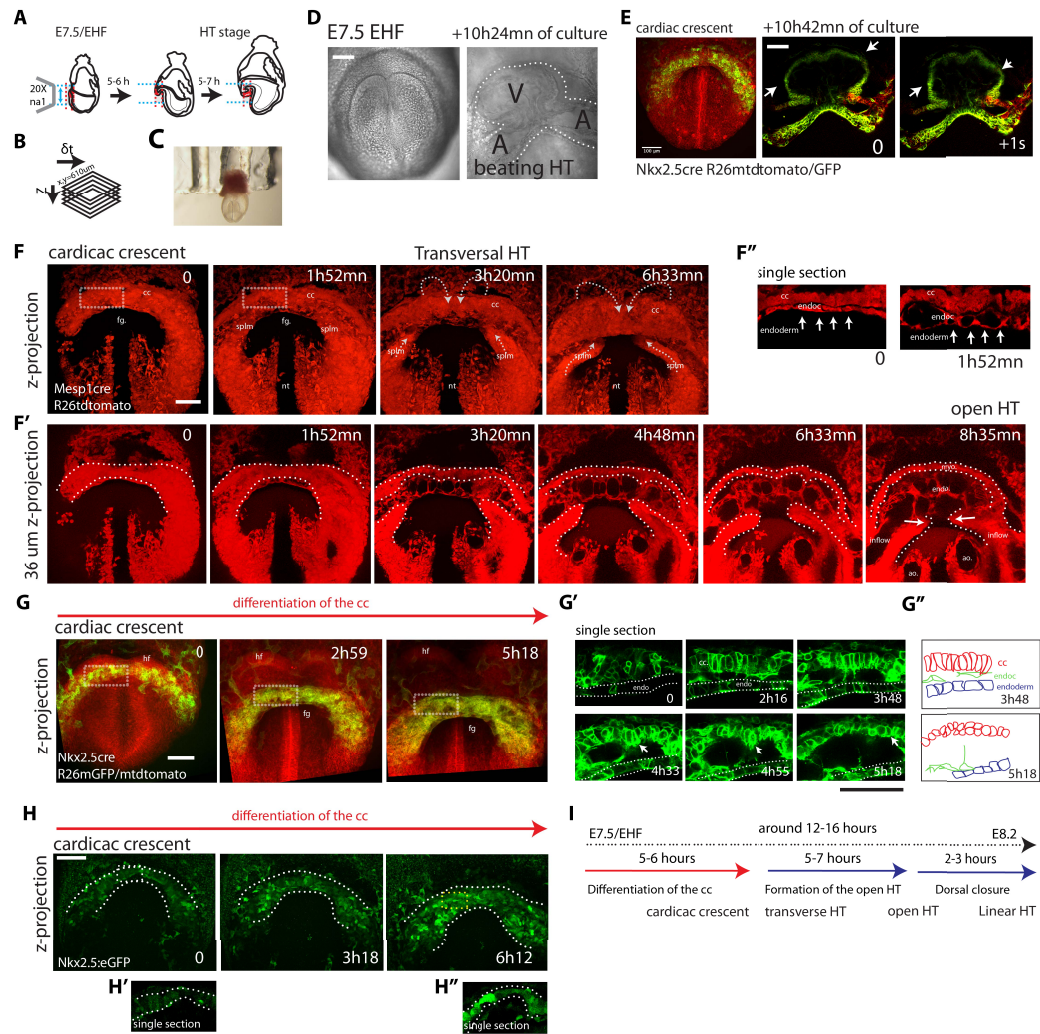

**Figure 4.** Live-imaging of cardiac differentiation and morphogenesis (A) Schematic of the set up for imaging live mouse embryos from EHF up to completion of HT formation. (B) Parameters xyzt during live-imaging. (C) An embryonic holder maintains the embryo still during live-imaging. (D-E) After over 10 hours of ex-vivo culture -inside the multi-photon chamber- the embryo has grown and the cardiac crescent transformed into a beating heart tube. Arrows in (E) point to the deformation of the heart ventricle during one heart beat cycle. See also Video 4. (F-F'') Time-lapse movie sequence of a *Mesp1cre*+/+; *R26tdtomato* embryo -reporting whole mesoderm-, showing the transition from cardiac crescent stage to heart tube stage. Note that at the initial time point, the foregut pocket is already visible. Arrows indicate the major tissue movements visible (folding of the cardiac crescent, cranial movement of the splanchnic mesoderm). The differentiation of cardiomyocytes detaching from the endoderm is visible in (F'). White arrows point to the endocardium. The formation of the endocardial lumen in the transversal HT is visible in F'. By 8h35mn, the open HT is fully formed and beating regularly. Images are z-max projection of 84 sections covering 180  $\mu$ m (F) and 9 sections covering 36  $\mu$ m (F') acquired every 4  $\mu$ m. See also Videos 5-6. (G-G'') (G) Time-lapse movie of an *Nkx2.5cre*+/+; *R26mtdtomato*/mGFP embryo during the early stages of cardiac differentiation. Images are z-max projection of 87 sections acquired every 5  $\mu$ m covering 437  $\mu$ m. (G') shows in a single optical section how progenitors change in cell shape and move away from the endoderm during differentiation towards cardiomyocytes (from inset in (G)). (G'') Cartoon depicting the change in cell shape taking place during cardiac differentiation. See also Video 7. (H) Time-lapse movie sequences of *Nkx2.5eGFP* embryos, from cardiac crescent stage showing an increase in GFP level during the stages cardiomyocytes undergo differentiation. (H' and H'') Cardiomyocytes in single magnified optical sections. Images are z-max projection of 70 optical sections acquired every 6  $\mu$ m covering 420  $\mu$ m. See also Video 10. (I) Estimate of the timing between different heart tube development stages. Scale bars: 100  $\mu$ m. fg: foregut cc: cardiac crescent, endoc: endocardium, ao: aorta, endo: endoderm, splm: splanchnic mesoderm, nt: neural tube

**Figure 4-Figure supplement 1.** Live-imaging of *Nkx2.5eGFP* reported line

**Figure 4-Figure supplement 2.** Embryos can be cultured and imaged under the 2-photon microscope for up to 24hours.



188 cells that showed high GFP intensity (top 50%) at the last time point of the movie (Figure 5F, H and  
189 Figure 5-source data 1) –since according to our previous analysis (Figure 3D)– these cells can reliably  
190 be assigned to cardiomyocytes. The initial location of the cells that increase their GFP level during  
191 tracking delineates a crescent-shaped domain at EHF stage (Figure 5H). Cells retaining lower GFP  
192 intensity level throughout the movie initially localise preferentially posteriorly and medially to this  
193 crescent. Most of the cells that have high GFP levels at the final time point have low GFP levels at  
194 the initial time point and sharply increase their GFP level over time (Figure 5E-G and Figure 5-source  
195 data 1). These results suggest that cardiomyocytes of the cc differentiate during 5-6 hours starting  
196 at the EHF stage, which is consistent with the onset of detectable cTnnT at that stage (Figure 1B and  
197 Figure 1-figure supplement 2A,A).

198 Cells in the cardiac mesoderm do divide during the observation time, so we identified cell division  
199 events and tracked the descendant cells. 43% of the tracked cells underwent one division during  
200 the 4-5 hour movies. To determine whether cell fate (differentiation versus progenitor) is lineage-  
201 allocated in the cardiogenic mesoderm at the EHF stage, we tracked GFP levels in dividing cells  
202 and their descendants. We found that most sister cell pairs show similar high or low GFP intensity  
203 levels at the end of the observation period (38 out of 39, Figure 5I, Figure 5- figure supplement 1A-D  
204 and Figure 5-source data 1). This observation suggests that commitment of cardiac precursors to  
205 differentiate is already established by the EHF stage and largely transmitted by lineage.

### 206 **Cardiomyocyte differentiation is not detected during heart tube morphogenesis**

207 We next studied cardiac differentiation dynamics during subsequent stages when the cc transforms  
208 into the HT by extensive morphogenesis. To do so, we tracked cells located in the splanchnic  
209 mesoderm in Nkx2.5-eGFP embryos at successive periods of around 3 hours covering the 5-7 hours  
210 during which the transversal HT transforms into the open HT (Figure 6A,B,E, Video 13 and Figure  
211 4-source data 1). We also tracked cardiomyocytes in the forming HT. The HT starts to beat during  
212 the observation period, especially at the later stages, and therefore, in some cases, cardiomyocyte  
213 cell shape can be distorted in single optical sections (Figure 6F), however the GFP level could  
214 be determined. Anterior movement of the cells can be observed in the splanchnic mesoderm  
215 concomitant with the transformation of the transversal HT into the open HT (visible also in Video  
216 5 and 11). We found that cells with high GFP level –differentiated cardiomyocytes– at the initial  
217 time points retain rather stable GFP levels (green tracks in Figure 6C,D, G and Figure 6-source data  
218 1). In addition, all cells that initially showed low GFP levels did not increase GFP intensity during  
219 time-lapse, and cardiac differentiation was therefore not detectable (red tracks in Figure 6C,D).

220 To confirm the absence of detectable cardiac differentiation events during this period, we  
221 next focused on cells located at the boundary area where progenitors are located outside the HT.  
222 As expected, we observed in the movies low-GFP cells located adjacent to high-GFP cells in the  
223 boundary zone (Figure 6H). Those cells retain stable GFP levels throughout the tracking time and  
224 did not increase their GFP level (Figure 6I, boundary imaged 20 times in distinct locations and in 6  
225 independent embryos). Importantly, they retain a columnar cell shape typical of weak cTnnT+ and  
226 cTnnT- columnar cells located at the boundary zone (see Figure 2F' and Figure 3B'). They also remain  
227 attached to endoderm and did not migrate into the HT. We confirmed this observation in longer  
228 time-lapse movies spanning 7 hours that covered the full transition period from transversal to open  
229 HT stage. Again, progenitors kept a strict boundary between with the differentiated cardiomyocytes  
230 of the HT throughout the entire time-lapse movie (Figure 7A-A'" and Video 14, boundary imaged 5  
231 times in distinct locations and in 2 independent embryos). All together, these data suggest that  
232 during the transformation of the cc into the dorsally open HT no cardiomyocytes are added to the  
233 HT from the SHF. These observations suggest two distinct phases of early HT formation: a first  
234 phase of differentiation of the FHF into the cc, lasting around 5 hours, and a second phase of HT  
235 morphogenesis in which the SHF progenitors remain undifferentiated, lasting around 7 hours.

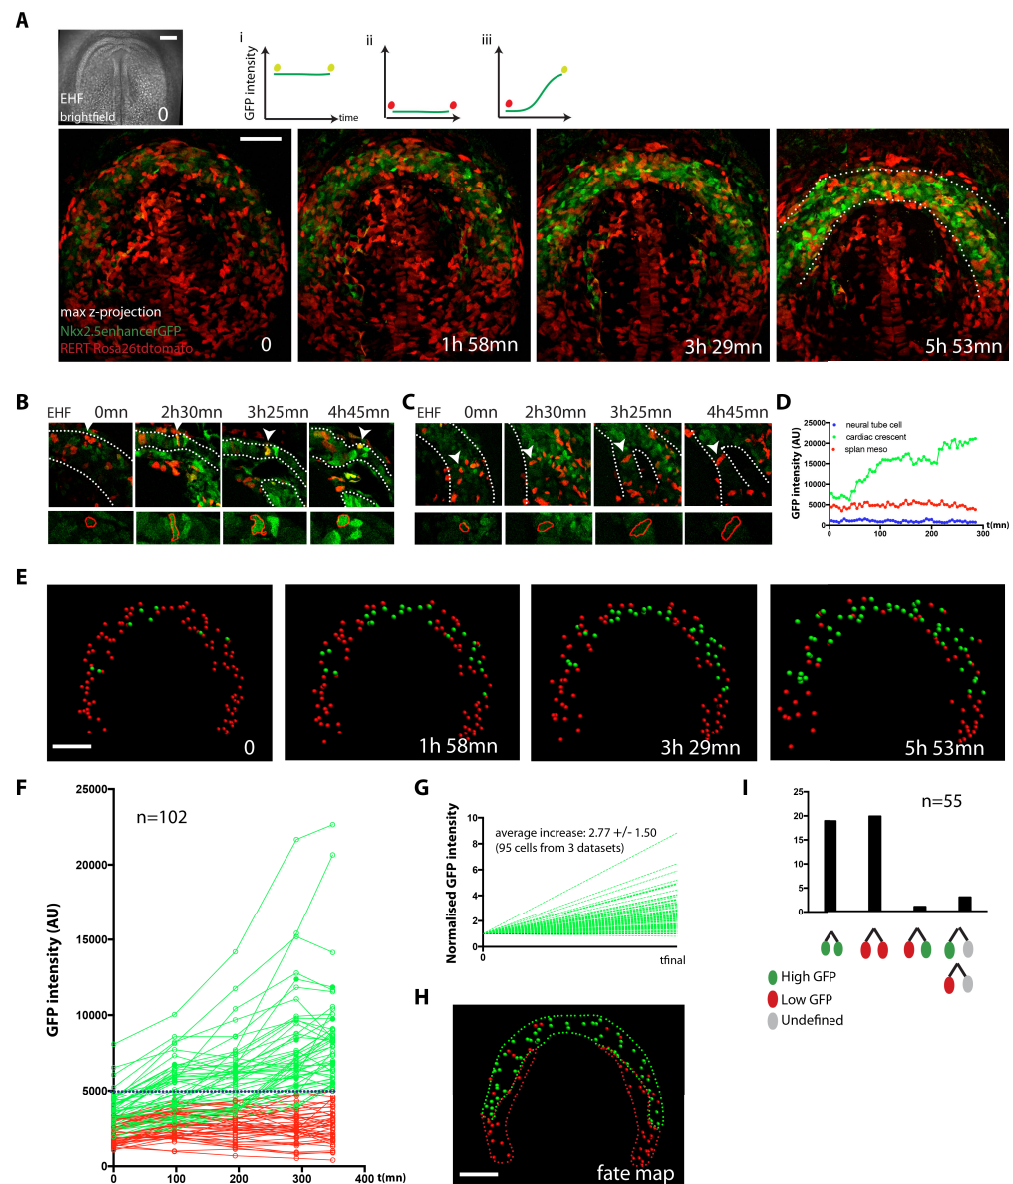

**Figure 5.** Live-imaging of cardiac differentiation at cellular resolution. (A) Time course of an RERT; R26tdtomato; Nkx2.5eGFP embryo during stages when cc differentiation takes place -from EHF onwards-. Images are Z-maximum projection of 76 sections acquired every 3  $\mu\text{m}$  covering 228  $\mu\text{m}$ . A brightfield image of the EHF embryo at the initial time point is also shown. (i, ii and iii) Rationale of the expected evolution of GFP expression: since tracks carry information on reporter expression, if a cell acquires a high level of GFP, we predict that it is committed to differentiate. See also Video 12. (B-D) Examples of time-lapse movies (B and C) and quantification of the GFP level (D) increasing in a single cardiomyocyte during differentiation (B) or remaining low in a cell located in the splanchnic mesoderm (C). A neural tube cell has been additionally quantified (blue). Images are single optical sections. (E) Time course of individual cells tracked in movie (A). Cells with GFP levels above the median intensity value of all cells at the end time point are represented as green spheres and cells with lower GFP levels are shown as red spheres. (F) GFP level through time. Blue dotted line: median value (5249 a.u.). GFP level for each tracked cell was measured at five successive time points. Cell divisions are not represented for simplicity. (G) Normalised GFP level showing an increase in GFP level in the green classified cells. Average increase: 2.77 folds  $\pm$  1.50, mean  $\pm$  SD, n=95 cells from 3 independent datasets. (H) The differentiation fates (green, cell that differentiates, red, cell that does not) of mesodermal cells were mapped onto the initial cardiac crescent at EHF stage. (I) Progenitor descendant cells share differentiation fate. Lineages of dividing progenitors (n=55 from 3 independent datasets) were identified during early stages of cardiac differentiation. Two daughter cells are defined as sharing the same fate if their GFP intensity levels do not differ by more than 1.5 fold and/or remain both above or below the threshold value defined. Scale bars: 100  $\mu\text{m}$ .

**Figure 5-Figure supplement 1.** Cells divide during cardiac differentiation.

**Figure 5-source data 1.**

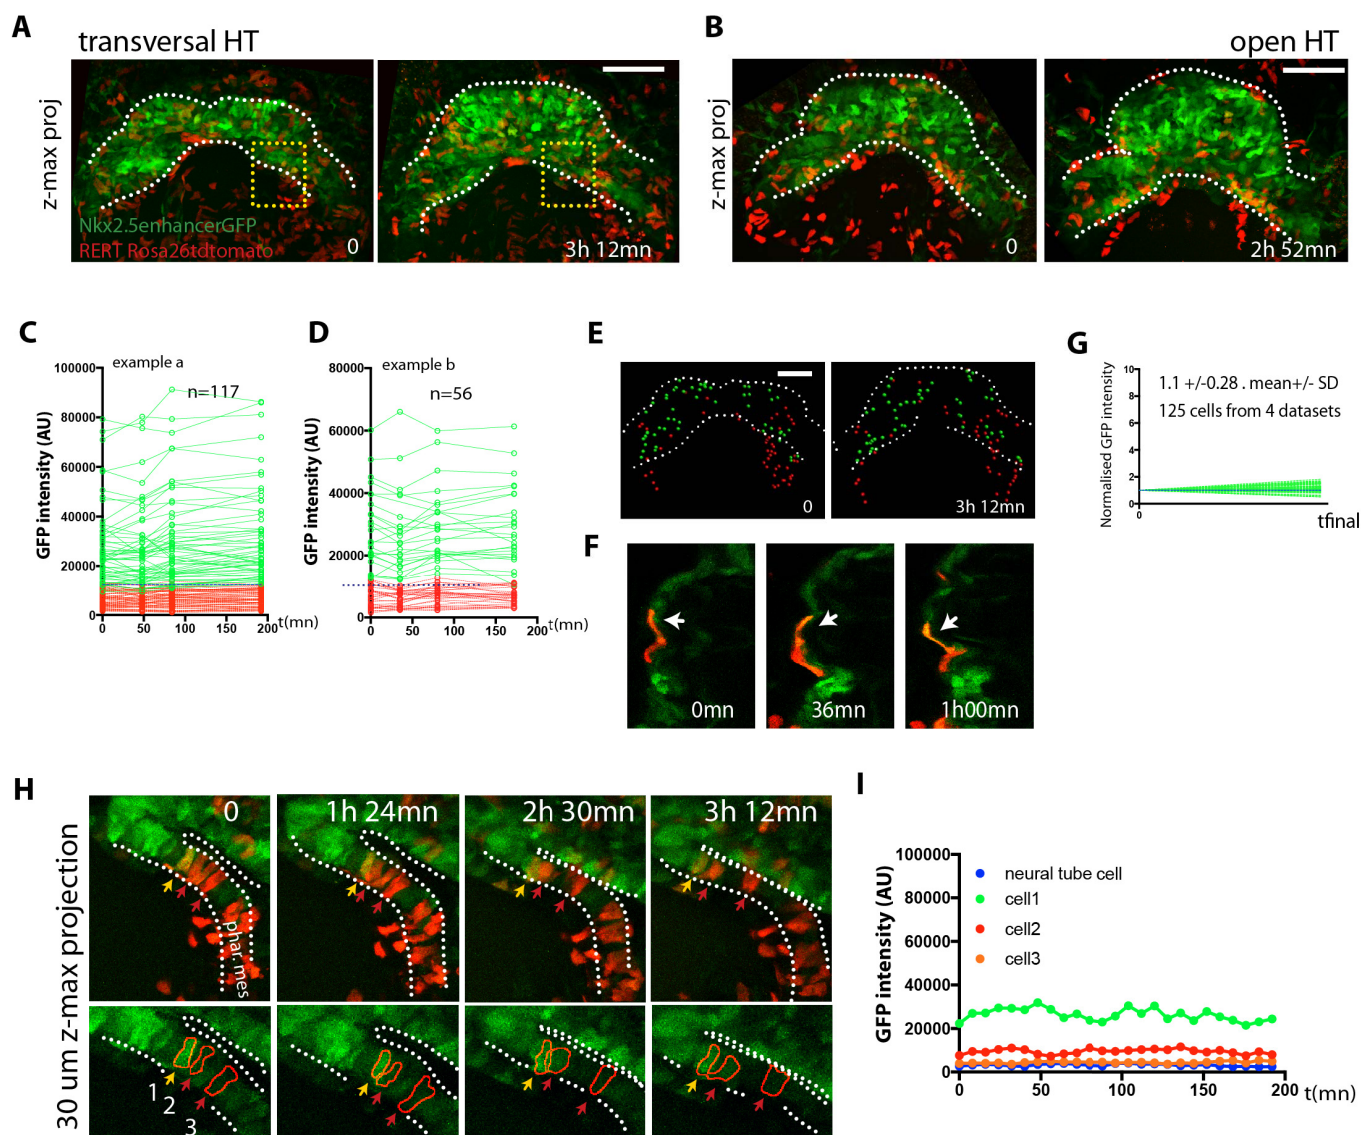

**Figure 6.** No cardiac differentiation is detected during early HT morphogenesis (A-B) Initial and final time points of two time-lapse movie of RERT; R26tdtomato/+; Nkx2.5eGFP embryos covering the transformation of the transversal HT into the open HT. Images are z-maximum projection of 44 sections acquired every  $5\ \mu\text{m}$  covering  $220\ \mu\text{m}$  in (A) and of 46 sections acquired every  $6\ \mu\text{m}$  covering  $276\ \mu\text{m}$  in (B). See also Video 13. (C, D) GFP levels over time of the cells tracked in (A, B). GFP level for each tracked cell was measured at four successive time points. Green tracks represent cardiomyocytes with GFP intensity above the median intensity value of all the tracked cells at the last time point, while red tracks represent cells with lower GFP level. Blue dotted line represents the median intensity value (10748 a.u. in (C) and 12248a.u. in (D)). Note that when cells divide, only one of the two daughter cells was represented for simplicity. (E) Distribution of the tracked cells from the time-lapse movie shown in (A). Red and Green classified cells are represented as spheres. (F) Example of red-labelled cardiomyocytes tracked in the beating HT ventricle. (G) Normalised progression of GFP level in green classified cells showing stable GFP levels. Data collected from 125 tracked cells from four independent movies of 2h52 to 3h12mn periods. Average increase: 1,1 folds  $\pm$  0.28, mean  $\pm$  SD. (H-I) (H) Example extracted from the movie in (A, yellow inset) of red-labelled cells in the boundary zone between undifferentiated and differentiated cells. (I) Quantification of GFP level through time of the three segmented cells shown in (H). Cells have stable GFP level and do not differentiate. Images are z-maximum projections of 6 sections acquired every  $5\ \mu\text{m}$  covering  $30\ \mu\text{m}$ . Scale bars:  $100\ \mu\text{m}$ .

**Figure 6-source data 1.**

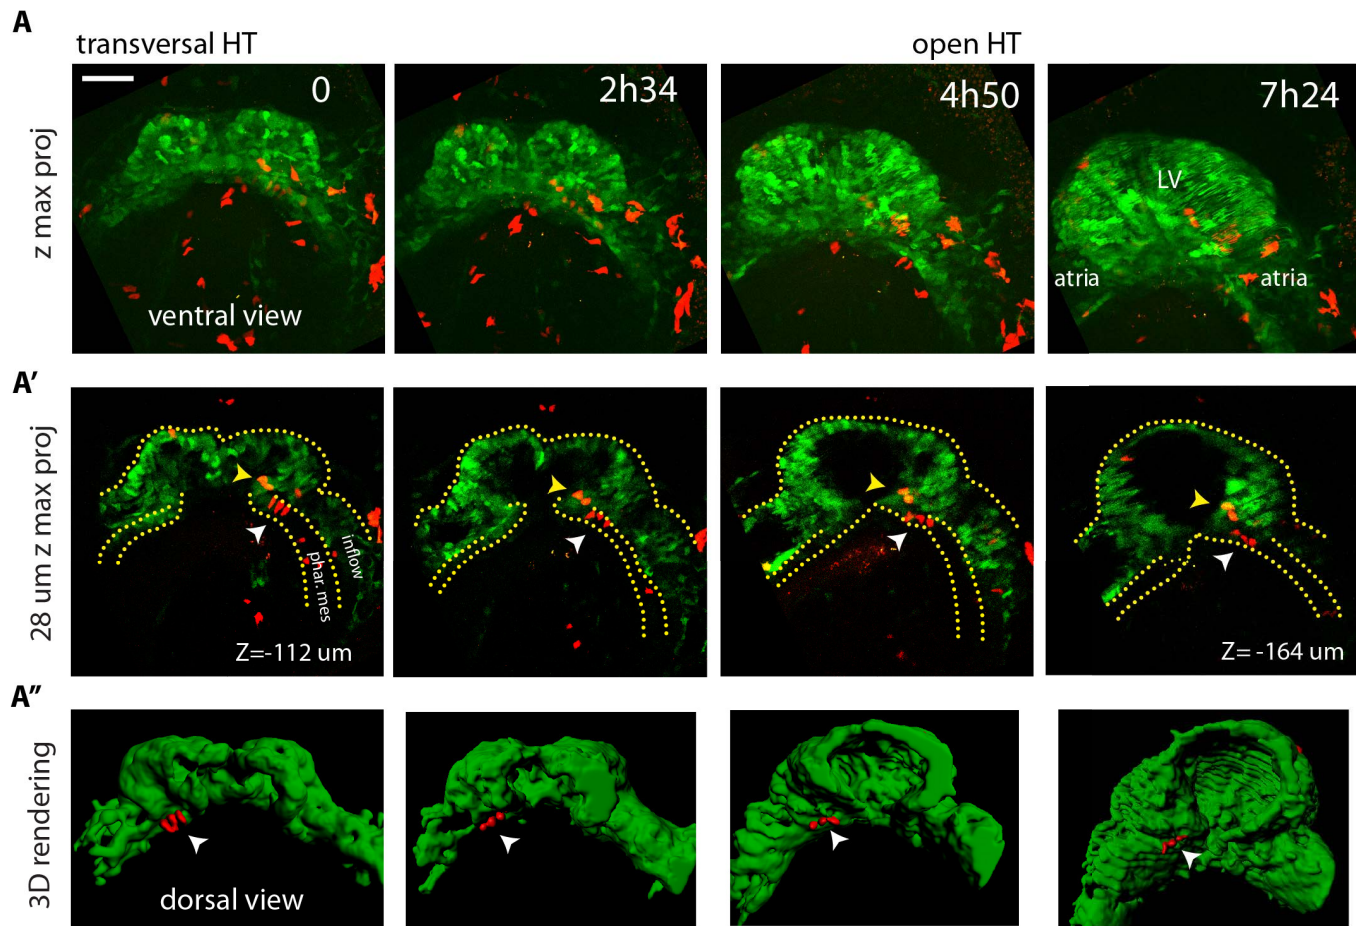

**Figure 7.** (A-A'') Time-lapse movie of an RERT; R26tdtomato; Nkx2.5eGFP embryo during the stages at which the transversal HT transforms into an open HT, showing cells located in the splanchnic mesoderm (white arrows in A' and A''), respecting the boundary with the HT (yellow arrows in A') show two cells located in the HT). Lower doses of tamoxifen have been injected in order to label only few cells in red. Images are z-maximum projection of 74 sections (A) acquired every 4  $\mu\text{m}$  covering 296  $\mu\text{m}$  and (A') 7 sections covering 28  $\mu\text{m}$ . (A'') 3D reconstruction based of the Nkx2.5eGFP signal (green) and red-labelled cells located in the splanchnic mesoderm. See also Video 14. Scale bars:100  $\mu\text{m}$

## 236 **Imaging the *Isl1*-expressing cell lineage confirms absence of cardiac progenitor dif-** 237 **ferentiation during early heart tube morphogenesis**

238 The LIM domain transcription factor *Isl1* (*Isl1*) is a cardiac progenitor marker. Its expression is  
239 transient in the precursors of the cc, while it remains expressed in SHF progenitors for an extended  
240 period (Brade et al., 2007; Prall et al., 2007) (Yuan and Schoenwolf, 2000). Cells of the *Isl1* lineage  
241 detected with Cre reporters therefore contribute only scarcely to the cc, while extensively to the  
242 SHF and its derivatives (Cai et al., 2003; Ma et al., 2008). To test these observations in live imaging,  
243 we combined *Nkx2.5-eGFP* with tracing of the *Isl1* cell lineage using the *Isl1cre/+* driver and the  
244 *R26tdtomato/tdtomato* reporter. We found that *tdtomato*-labelling is first detectable in scarce  
245 isolated cells of the GFP+ cc when the cc folds ventrally and differentiates (from t=2h36m to t=4h  
246 in Figure 8A,B). A dense *tdtomato*-labelling appears instead in the GFP-low cells of the splanchnic  
247 mesoderm (from t=2h24m to t=4h in Figure 8A and C and Video 15), as well as in the endoderm and  
248 endocardium (not shown). Consistently with previous reports (Cai et al., 2003), Cre-recombination  
249 detected in live analysis occurs at low frequency in the cc and at high frequency in the SHF.

250 Once the cc is formed, if cells of the SHF would continuously differentiate, then regions of  
251 the forming heart tube contributed by the SHF precursors should be densely co-labelled by both  
252 the GFP and *tdtomato* fluorophore. Live imaging shows instead that *tdtomato*+ cells establish a  
253 boundary with GFP+ cells, indicating again no signs of differentiation of SHF precursors during  
254 the observation period (Figure 8A,C and Videos 16). Multi-photon imaging however doesn't allow  
255 to image unambiguously all cells located deep inside the live tissue at the final stages recorded,  
256 because of limited depth penetration and light scattering resulting in low signal to noise ratio. The  
257 prospective outflow track in particular is located deep in the embryo (Figure 8-figure supplement  
258 1A-A", at around -200  $\mu\text{m}$  depth, see next section) and it is therefore challenging to accurately track  
259 GFP levels there. To overcome these limitations, we fixed the embryos after completion of the live-  
260 imaging experiments, immunostained those embryos against cTnnT and imaged them after clearing  
261 by confocal microscopy. No domains containing predominantly double-labelled cells were detected,  
262 indicating that progenitors located in the SHF did not undergo differentiation in the boundary zone  
263 from cc to open HT stage (Figure 7D). These results are consistent with our single cell tracking  
264 analysis and confirm that the SHF does not differentiate during linear HT morphogenesis.

## 265 **Cardiac differentiation is detected during the late stages of HT development**

266 We next wanted to determine when cardiac progenitors located in the SHF start to differentiate.  
267 We fixed *Nkx2.5-eGFP; Isl1cre/+; R26tdtomato/+* embryos at different stages from cc up to heart  
268 looping (n=10) and assessed the appearance of GFP and *tdtomato* double-positive domains in  
269 the HT. In agreement with our previous observations, we found that SHF cells do not differentiate  
270 up to the open HT stage, when the dorsal seam of the heart is still open. In contrast, massive  
271 appearance of double positive cells is observed subsequently in the fully closed HT reinforcing our  
272 previous interpretation (Zaffran et al., 2004) (Laugwitz et al., 2005) (Moretti et al., 2006) (Figure 8E,  
273 F and Videos 17-18). At this stage the primordium of the RV has been added to the OFT and is  
274 fully composed of double-positive cells. The dorsal seam of the HT is also densely populated by  
275 double-positive cells, indicating a contribution of precursors from the SHF to the cardiomyocyte  
276 population that finalizes the dorsal closure of the linear HT.

## 277 **Discussion**

278 Here, we established a whole-embryo live-imaging method based on multiphoton microscopy  
279 that allows us whole-tissue tracking at cellular resolution. By combining various genetic tracing  
280 tools, we labelled progenitor and differentiated cardiomyocytes and performed 3D cell tracking  
281 over time combined with 3D reconstruction of the HT at multiple stages. We report three distinct  
282 temporal phases of HT formation (Figure 9). During the first phase, the cc differentiates rapidly  
283 and morphogenesis, in terms of changes in the relative position of cells is minimal. During the

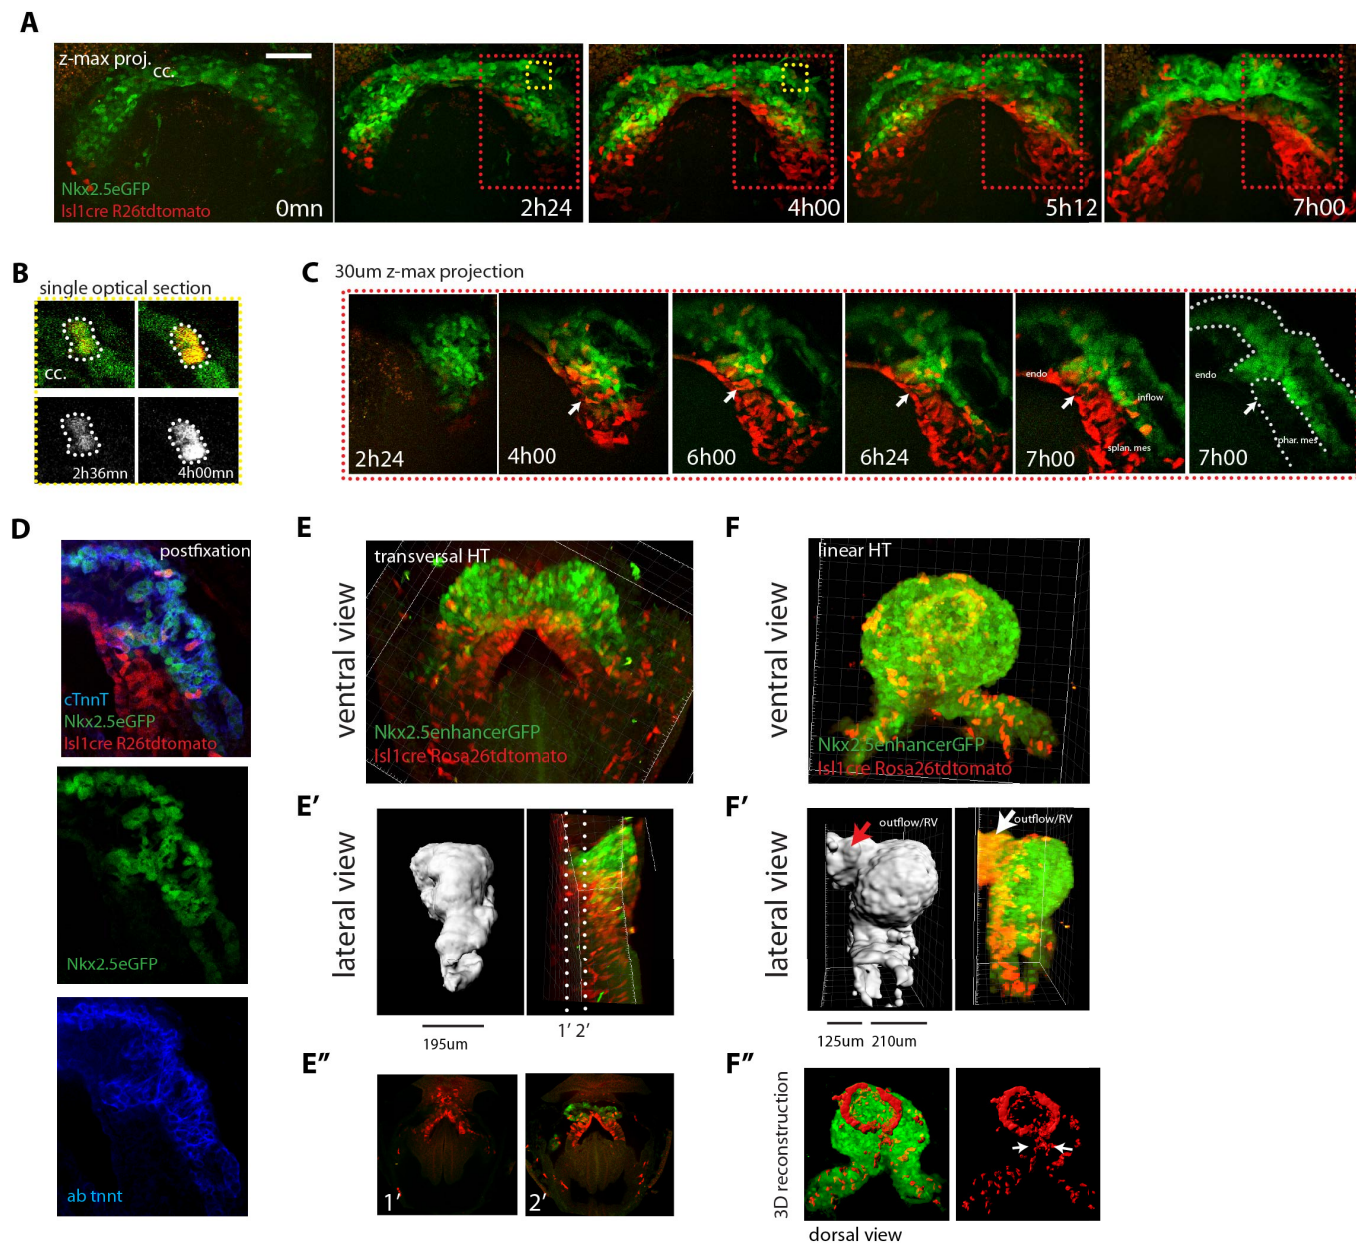

**Figure 8.** Analysis of *Isl1*-expressing cells during early heart development. (A) Time-lapse movie sequences of an *Isl1cre/+*; *R26tdtomato/+*; *Nkx2.5eGFP* embryo showing that the *Rosa26* locus recombines at a higher frequency in the splanchnic mesoderm compared to the FHF ( $n=3$  movies from cc up to open HT stage). (B) Yellow inset from (A). Two cells of the *Isl1* lineage located in the cc increase their *tdtomato* level over time. (C) Red inset in (A); increase of the *tdtomato* intensity in the splanchnic mesoderm over time. Arrow shows the boundary between SHF and FHF and points to a single cell in the SHF that retains a low level of GFP and an elongated cell shape. Images are z-maximum projection of 45 sections acquired every 5µm and covering 225 µm in (A) and of 6 sections covering 30 µm in (C). Interval between frames: 6min. See also Videos 15-16. (D) Same embryo as in (A) post-fixed and immunostained against cTnnT after live-imaging, showing that the red cells located in the splanchnic mesoderm are undifferentiated. (E, F) *Isl1cre/+*; *R26tdtomato/+*; *Nkx2.5eGFP* embryos showing no contribution of the *Isl1* lineage to the differentiated HT (E-E'') but contributing robustly to the outflow tract and dorsal aspect of the linear HT (F-F''). The presence of double-positive cells in these areas reveals the differentiation of *Isl1* lineage cells into cardiomyocytes (F, F''). Images are 74 and 134 optical sections acquired every 2.5 µm and covering 195 µm and 335 µm, respectively. In (F, F') only the double-positive cells located in the linear HT are shown, while the *tdtomato*+ progenitors, located outside the linear HT are not shown. Lateral views are shown in (E', F') including 3D reconstruction. (E'') Cross-sections xy along the dotted lines shown in (E). Dorsal views are shown in (F'') including the 3D reconstruction of the *tdtomato*+ cells located in the linear HT. White arrows show the dorsal regions of the linear HT. endo : endoderm, splan. meso: splanchnic mesoderm. Scale bars: 100 µm.

**Figure 8-Figure supplement 1.** GFP level in deeper z level cannot be accurately quantified.

284 second phase, differentiation is not detected and morphogenetic remodelling gives rise to a  
285 dorsally open HT. During the third phase, cardiac precursor recruitment and differentiation resumes,  
286 contributing to the formation of the RV and the dorsal closure of the HT. Our results support the early  
287 establishment of distinct FHF and SHF cell populations and show that the morphogenetic changes  
288 that transform the cc into a HT largely take place in the absence of cardiac precursor differentiation.  
289 These observations indicate tissue-level coordination of differentiation and morphogenesis during  
290 early cardiogenesis in the mouse.

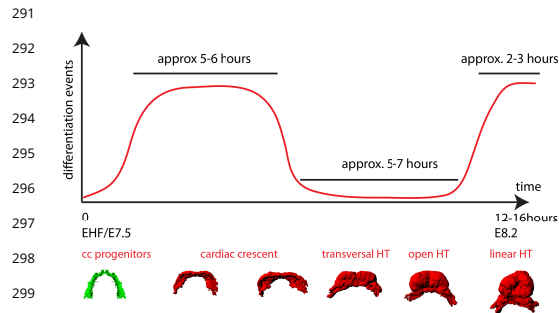

291  
292  
293  
294  
295  
296  
297  
298  
299  
300  
**Figure 9.** A model of cardiomyocyte differentiation  
301 dynamics during early heart development. We  
302 propose that two distinct phases of cardiomyocyte  
303 differentiation take place during early heart  
304 development. At EHF, the cc differentiates and  
305 starts folding. Cardiomyocytes round up and  
306 become contractile while the cardiac progenitors  
307 located in the splanchnic mesoderm remain  
308 undifferentiated. Subsequently, the cc. undergoes  
309 further morphogenesis to transform into a HT,  
310 initially open dorsally and no cardiomyocyte  
311 differentiation is detected during this  
312 transformation. Finally, cardiac differentiation  
313 resumes contributing new cardiomyocytes from  
314 the splanchnic mesoderm to the outflow track, (the  
315 prospective RV), and the dorsal closure of the HT.

316  
317 the two distinct differentiation schedules described here. Environmental clues could also control  
318 the sequential differentiation of FHF and SHF precursors. The Wnt and BMP pathways are well  
319 known regulators of cardiac differentiation (Ai et al., 2007; Jain et al., 2015; Klaus et al., 2007; Kwon  
320 et al., 2007; Marvin et al., 2001; Qyang et al., 2007; Tirosh-Finkel et al., 2010; Ueno et al., 2007) and  
321 specific mechanisms affecting these pathways could be operating during the formation the HT,  
322 whereby the differentiation pathways could be temporally restrained.

323 In zebrafish, elegant experiments using a cardiac myosin light chain reporter line similarly ad-  
324 dress the temporal order of cardiac differentiation in live embryos using high resolution imaging (de  
325 Pater et al., 2009; Liu and Stainier, 2012). Two distinct phases of cardiomyocyte differentiation  
326 separated in time were also observed. During a first phase, cardiomyocytes were recruited in the  
327 linear HT. During a second phase, a late cardiogenic population of cardiomyocytes was added at  
328 the arterial pole of the HT. This study did not report, however, an arrest of cardiac differentiation  
329 during the morphogenesis of the initial HT as we do observe in Mouse. Instead, cardiac differ-  
330 entiation seems to be continuous and extensively overlaps with morphogenetic reorganisations in  
331 zebrafish. It would be therefore of interest to further address the morphogenetic and evolutionary  
332 implications of these differences.

333 Our study applies for the first time whole-embryo live analysis of cardiac development at tissue  
334 level and with cellular resolution. We expect that extending this experimental approach to additional

We show in addition similarities in the differ-  
entiation dynamics of SHF precursors and car-  
diomyocytes contributing to the dorsal regions  
of the linear HT (Meilhac et al., 2004b). The dor-  
sal aspect of the linear HT gives rise to the inner  
curvature of the looped heart, which generates  
non-chamber myocardium contributing to atrio-  
ventricular canal and conduction system. Our  
results suggest that the late recruitment of pro-  
genitors in the dorsal HT contributes to the speci-  
fication of cardiomyocytes in this region of the HT  
as non-chamber myocardium, while the ventral  
domains of the linear HT will become specialized  
as ventricular chamber myocardium (Christoffels  
et al., 2000).

Prospective clonal analyses showed that the  
FHF and SHF are specified at different time points  
during gastrulation and have distinct molecular  
signatures (Devine et al., 2014; Lescroart et al.,  
2014). Here, by direct cell lineage tracing coupled  
with differentiation reporting, we suggest that  
FHF and SHF precursors are largely lineage allo-  
cated in the cardiogenic region prior to differentia-  
tion. Further studies will be required, however,  
to assess how genes differentially expressed in  
the FHF and SHF contribute to the regulation of

335 aspects of embryonic development will allow to further uncover unexpected and novel mechanisms  
336 of organogenesis. In addition, limited attention had been paid so far to the temporal dynamics  
337 of differentiation during embryonic development, yet it is an essential aspect of organogenesis  
338 (Gogondeau et al., 2015; Parchem et al., 2015; Yang et al., 2015). Here we show the relevance of  
339 regulation of differentiation timing during heart tube formation. Further understanding of the  
340 molecular and cellular mechanisms underlying these phenomena will help us expanding pools of  
341 cardiac progenitors in vitro or directing them towards differentiation.

## 342 **Methods and Materials**

### 343 **Mouse Strains**

344 The following mouse lines were used: *Mesp1* cre (Saga et al., 1999), *Isl1* cre (Cai et al., 2003), *Nkx2.5* cre  
345 (Stanley et al., 2002), *Rosa26* tdTomato (Madisen et al., 2010), *ROSA26* mTmG (Muzumdar et al.,  
346 2007), *Nkx2.5* eGFP (Wu et al., 2006), *CreERT2* (RERT) (Guerra et al., 2003) and C57BL/6. Mice were  
347 genotyped as previously described. All animal procedures were approved by the CNIC Animal Ex-  
348 perimentation Ethics Committee, by the Community of Madrid (Ref. PROEX 220/15) and conformed  
349 to EU Directive 2010/63EU and Recommendation 2007/526/EC regarding the protection of animals  
350 used for experimental and other scientific purposes, enforced in Spanish law under Real Decreto  
351 1201/2005.

### 352 **Immunostaining and Imaging**

353 Embryos dissected in Dulbecco's modified Eagle's medium (DMEM, Invitrogen) were fixed overnight  
354 in 2% PFA at 4 °C, then permeabilised in PBST (PBS containing 0.1% Triton X-100) and blocked (5%  
355 goat serum). Embryos were incubated overnight at 4 °C with antibodies diluted in PBST: mouse  
356 anti-cTnnT (1:250, MS-295 Thermo Scientific), rabbit anti-PH3 (1:250, 06-570 Millipore) and rabbit  
357 anti-Laminin1 (1:500, Sigma). After washing in freshly prepared PBST at 4C, embryos were incubated  
358 with secondary antibodies (Molecular Probes) coupled to 488, 549 or 649 fluorophores as required  
359 at 1:250 and DAPI at 1:500 (Molecular Probes) overnight at 4 °C. Before imaging, embryos were  
360 washed in PBST at room temperature and cleared with focus clear (Cell Explorer) to enhance the  
361 transparency of the embryo. Confocal images were obtained on a SP8 Leica confocal microscope  
362 with a 20X oil objective (0.7 NA) at a 1024 × 1024 pixel dimension with a z-step of 2-4 µm. Embryos  
363 were systematically imaged throughout the entire heart tube from top to bottom.

### 364 **3D Reconstruction and Volumetric Measurement**

365 For 3D rendering, fluorescent signal in confocal z-stacks was first segmented by setting intensity  
366 thresholds using the trainable Weka segmentation tool plugin available in Fiji (Arganda-Carreras  
367 et al., 2017; Schindelin et al., 2012). The resulting z-stacks were then corrected manually on a  
368 slide-by-slide basis to eliminate segmentation mistakes. In case of the cTnnT immunofluorescence  
369 images (Figure 1), background signal from the yolk sack was manually masked. Volume of the  
370 cTnnT positive myocardium was then computed by multiplying the total segmented area by the  
371 z-stack interval using custom Fiji macro. In the *Nkx2.5* cre/+; *R26* tdTomato and *Nkx2.5* eGFP embryos,  
372 fluorophore signal present in the endothelium, endocardium and endoderm cells was manually  
373 masked prior to segmentation (Figure 2B, Figure 6A"). For 3D visualisation of the 3D segmented  
374 image stacks, Imaris software (Bitplane) was used.

### 375 **Embryo Culture and Multiphoton Live-Imaging**

376 Embryos were dissected at E7.5 in pre-equilibrated DMEM supplemented with 10% foetal bovine  
377 serum, 25 mM HEPES-NaOH (pH 7.2), penicillin (50µm121) and streptomycin (50 mg ml21). Embryos  
378 were staged on the basis of morphological criteria (supplementary Figure 1) (Downs and Davies,  
379 1993; Kirstie A. Lawson, 2016), and those between the bud and early somitogenesis stages were  
380 used for culture and time-lapse imaging. To track the early phase of cardiac differentiation and



381 subsequent phase of morphogenesis, we used embryo at EHF and transversal HT stage respectively.  
382 Embryos were cultured in 50% fresh rat serum, 48% DMEM without phenol red, 1% N-2 neuronal  
383 growth supplement (100X, Invitrogen 17502-048) and 1percent B-27 supplement (50X Thermo  
384 Fisher Scientist 17504044) filter sterilised through a 0.2 mm filter. To hold the embryo in position  
385 during time-lapse acquisition, we made special plastic holders with holes of different diameters (0.5-  
386 3 mm) to ensure a good fit of the embryos similarly to the traps developed by Nonaka et al. (Nonaka,  
387 2009; Nonaka et al., 2002). Embryos were mounted with their anterior side facing up. To avoid  
388 evaporation, the medium was covered with mineral oil (Sigma-Aldrich; M8410). Before starting the  
389 time-lapse acquisition, the embryos were first pre-cultured for at least 2 hours in the microscopy  
390 culture set up. The morphology of the embryo was then carefully monitored and if the embryos  
391 appeared unhealthy or rotate and move, they were discarded, otherwise, time-lapse acquisition  
392 was proceed. For the acquisition, we used the Zeiss LSM780 2-photon microscope equipped with  
393 a 5% CO2 incubator and a heating chamber maintaining 37 °C. The objective lens used was a 20X  
394 (NA=1) deeping objectives that has a long working distance for imaging mouse embryos and tissues.  
395 MaiTai laser line 1000 nm was used for 2-channel 2-photon imaging. Acquisition was done using  
396 Zen software (Zeiss). Typical image settings were: output power: 250mW, pixel dwell time: 7us,  
397 line averaging: 2 and image dimension: 610x610um (1024x1024 pixels). To maximize the chance  
398 of covering the entire heart tube during long term time lapse movies, we included, at the starting  
399 point, 150-200 µm of imaging space in z over the top of the embryo.

#### 400 **Cell labelling and 3D tracking and GFP Intensity Measurement**

401 For labelling of single cells, Tamoxifen was administered by oral gavage (2-4 mg/mL) in RERT/Rosa26R-  
402 tdtomato at E7. We then tracked single tdtomato-labelled cells located within the cardiogenic meso-  
403 derm -excluding endothelial, pericardial and endodermal cells- and measured their GFP intensity  
404 over time. To track cells manually in 4D stacks, the MTrackJ Fiji plugin (Meijering et al., 2012) was  
405 used. A local square cursor (25x25 pixels) on the cell of interest snaps according to a bright centroid  
406 feature on a slice-by-slice basis. Only tracks lasting for the entire length of the movie were kept.  
407 When an ambiguity arises in the tracking, from one time point to the next, the track was discarded.  
408 Tracks split at cell divisions. A cell division event is normally clearly distinguishable over at least 2  
409 time points. In case one of the two daughter cells is not tractable, the other daughter cell is still  
410 tracked. Each tracks is assigned an ID number and a excel files with all the tracks coordinates in  
411 x, y, z and t was generated. Coordinates of each tracks were converted into 8-bit 4D image using  
412 a custom Fiji macro in which each cells was represented by a sphere of specific pixel intensity,  
413 from 1 to 255, while pixels corresponding to background were set to zero. The 4D images were  
414 then opened with Imaris to perform visualization of the 3D trajectories of each cells using spots  
415 tool, where each object were identified according to pixel intensity. GFP intensity measurement is  
416 performed by segmentation of cell shape. A Gaussian filter whose radius is adjusted to the typical  
417 size of a cell was first applied, followed by a Laplacian filter. The resulting 32 bits image was next  
418 converted to a mask by thresholding. When objects were touching each other, a watershed on the  
419 binary mask and manual corrections was applied. Each segmented cells was checked and tracked  
420 manually for accuracy. In Figure 2E nuclei segmentation was performed manually. The mean GFP  
421 signal intensity of the segmented objects was then measured using the “analyse particle” tool in  
422 Fiji. To quantify GFP level through time of tracked cells, four to five successive time points were  
423 arbitrarily chosen in each dataset (Figure 5F, Figure 6C,D and Figure 5-figure supplement 1C) except  
424 in Figure 5D and Figure 6I, where GFP intensity level was measured in every time point. Background  
425 intensities were measured in neural tube cells, which are known to be negative for GFP and cTnnT.  
426 Tables containing ID tracked number and GFP intensities were generated and plotted using Prism  
427 statistical software.

## 428 **Statistical Analysis**

429 For comparisons of two groups, a Man-Whitney U-test was used using Prism statistical software. To  
430 find a correlation between GFP and cTnnT levels of 0.8 with an alpha-level of 0.05 and a power of  
431 0.2 at least 10 cells per embryo were required (Figure 3D and Figure 3-figure supplement 2C). Many  
432 more cells were computed for each experiments. The linear fit was done using lm function from  
433 the R statistical software ([www.r-project.org](http://www.r-project.org)).

## 434 **Acknowledgments**

435 We thank the CNIC Microscopy unit for help with the live confocal analysis, Fatima Sanchez Cabo  
436 for help with the statistical analyses and Florencia Cavodeassi, Miguel Manzanares, Brian Laruy  
437 and members of the Torres lab for helpful comments on the manuscript. This work was supported  
438 by grants BFU2015-71519-P and RD16/0011/0019 (ISCIII) from the Spanish Ministry of Economy,  
439 Industry and Competitiveness (MEIC). KI was supported by a Human Frontiers Science Program  
440 (LT000609/2015) and EMBO (ATL1275-2014) postdoctoral fellowships. The CNIC is supported by the  
441 Spanish MEIC and the Pro CNIC Foundation, and is a Severo Ochoa Center of Excellence (MINECO  
442 award SEV-2015-0505). The authors declare no conflicts of interest.

## 443 **Author Contributions**

444 KI and MT conceived the project, KI performed the experiments and analysed the data, ST provided  
445 technical help, KI and MT wrote the manuscript

## 446 **References**

- 447 Abu-Issa, R. (2014). Heart fields: spatial polarity and temporal dynamics. *Anat Rec (Hoboken)* 297,  
448 175-182.
- 449 Abu-Issa, R., Waldo, K., and Kirby, M.L. (2004). Heart fields: one, two or more? *Dev Biol* 272,  
450 281-285.
- 451 Ai, D., Fu, X., Wang, J., Lu, M.F., Chen, L., Baldini, A., Klein, W.H., and Martin, J.F. (2007). Canonical  
452 Wnt signaling functions in second heart field to promote right ventricular growth. *Proc Natl Acad  
453 Sci U S A* 104, 9319-9324.
- 454 Arganda-Carreras, I., Kaynig, V., Rueden, C., Eliceiri, K.W., Schindelin, J., Cardona, A., and Se-  
455 ung, H.S. (2017). Trainable Weka Segmentation: a machine learning tool for microscopy pixel  
456 classification. *Bioinformatics*.
- 457 Biben, C., Weber, R., Kesteven, S., Stanley, E., McDonald, L., Elliott, D.A., Barnett, L., Koentgen,  
458 F., Robb, L., Feneley, M., et al. (2000). Cardiac septal and valvular dysmorphogenesis in mice  
459 heterozygous for mutations in the homeobox gene *Nkx2-5*. *Circ Res* 87, 888-895.
- 460 Brade, T., Gessert, S., Kuhl, M., and Pandur, P. (2007). The amphibian second heart field: *Xenopus*  
461 *islet-1* is required for cardiovascular development. *Dev Biol* 311, 297-310.
- 462 Buckingham, M., Meilhac, S., and Zaffran, S. (2005). Building the mammalian heart from two  
463 sources of myocardial cells. *Nat Rev Genet* 6, 826-835.
- 464 Cai, C.L., Liang, X., Shi, Y., Chu, P.H., Pfaff, S.L., Chen, J., and Evans, S. (2003). *Isl1* identifies a  
465 cardiac progenitor population that proliferates prior to differentiation and contributes a majority of  
466 cells to the heart. *Dev Cell* 5, 877-889.
- 467 Chen, C.M., Miranda, A.M., Bub, G., and Srinivas, S. (2014). Detecting cardiac contractile activity  
468 in the early mouse embryo using multiple modalities. *Front Physiol* 5, 508.
- 469 Christoffels, V.M., Habets, P.E., Franco, D., Campione, M., de Jong, F., Lamers, W.H., Bao, Z.Z.,  
470 Palmer, S., Biben, C., Harvey, R.P., et al. (2000). Chamber formation and morphogenesis in the  
471 developing mammalian heart. *Dev Biol* 223, 266-278.
- 472 Christoffels, V.M., Mommersteeg, M.T., Trowe, M.O., Prall, O.W., de Gier-de Vries, C., Soufan,  
473 A.T., Bussen, M., Schuster-Gossler, K., Harvey, R.P., Moorman, A.F., et al. (2006). Formation of the

- 474 venous pole of the heart from an Nkx2-5-negative precursor population requires Tbx18. *Circ Res*  
475 98, 1555-1563.
- 476 de Boer, B.A., van den Berg, G., de Boer, P.A., Moorman, A.F., and Ruijter, J.M. (2012). Growth  
477 of the developing mouse heart: an interactive qualitative and quantitative 3D atlas. *Dev Biol* 368,  
478 203-213.
- 479 de Pater, E., Clijsters, L., Marques, S.R., Lin, Y.F., Garavito-Aguilar, Z.V., Yelon, D., and Bakkers,  
480 J. (2009). Distinct phases of cardiomyocyte differentiation regulate growth of the zebrafish heart.  
481 *Development* 136, 1633-1641.
- 482 Devine, W.P., Wythe, J.D., George, M., Koshiba-Takeuchi, K., and Bruneau, B.G. (2014). Early  
483 patterning and specification of cardiac progenitors in gastrulating mesoderm. *Elife* 3.
- 484 Downs, K.M., and Davies, T. (1993). Staging of gastrulating mouse embryos by morphological  
485 landmarks in the dissecting microscope. *Development* 118, 1255-1266.
- 486 Evans, S.M., Yelon, D., Conlon, F.L., and Kirby, M.L. (2010). Myocardial lineage development.  
487 *Circ Res* 107, 1428-1444. Francou, A., Saint-Michel, E., Mesbah, K., and Kelly, R.G. (2014). TBX1  
488 regulates epithelial polarity and dynamic basal filopodia in the second heart field. *Development*  
489 141, 4320-4331.
- 490 Gogendeau, D., Siudeja, K., Gambarotto, D., Penetier, C., Bardin, A.J., and Basto, R. (2015).  
491 Aneuploidy causes premature differentiation of neural and intestinal stem cells. *Nat Commun* 6,  
492 8894.
- 493 Guerra, C., Mijimolle, N., Dhawahir, A., Dubus, P., Barradas, M., Serrano, M., Campuzano, V., and  
494 Barbacid, M. (2003). Tumor induction by an endogenous K-ras oncogene is highly dependent on  
495 cellular context. *Cancer Cell* 4, 111-120.
- 496 Jain, R., Li, D., Gupta, M., Manderfield, L.J., Ifkovits, J.L., Wang, Q., Liu, F., Liu, Y., Poleshko, A.,  
497 Padmanabhan, A., et al. (2015). HEART DEVELOPMENT. Integration of Bmp and Wnt signaling by  
498 Hopx specifies commitment of cardiomyoblasts. *Science* 348, aaa6071.
- 499 Kelly, R.G., Brown, N.A., and Buckingham, M.E. (2001). The arterial pole of the mouse heart forms  
500 from Fgf10-expressing cells in pharyngeal mesoderm. *Dev Cell* 1, 435-440.
- 501 Kelly, R.G., Buckingham, M.E., and Moorman, A.F. (2014). Heart fields and cardiac morphogenesis.  
502 *Cold Spring Harb Perspect Med* 4.
- 503 Kirstie A. Lawson, V.W. (2016). A Revised Staging of Mouse Development Before Organogenesis.  
504 Kaufman's Atlas of Mouse Development Supplement.
- 505 Klaus, A., Saga, Y., Taketo, M.M., Tzahor, E., and Birchmeier, W. (2007). Distinct roles of Wnt/beta-  
506 catenin and Bmp signaling during early cardiogenesis. *Proc Natl Acad Sci U S A* 104, 18531-18536.
- 507 Kwon, C., Arnold, J., Hsiao, E.C., Taketo, M.M., Conklin, B.R., and Srivastava, D. (2007). Canonical  
508 Wnt signaling is a positive regulator of mammalian cardiac progenitors. *Proc Natl Acad Sci U S A*  
509 104, 10894-10899.
- 510 Laugwitz, K.L., Moretti, A., Lam, J., Gruber, P., Chen, Y., Woodard, S., Lin, L.Z., Cai, C.L., Lu, M.M.,  
511 Reth, M., et al. (2005). Postnatal Isl1+ cardioblasts enter fully differentiated cardiomyocyte lineages.  
512 *Nature* 433, 647-653.
- 513 Lescroart, F., Chabab, S., Lin, X., Rulands, S., Paulissen, C., Rodolosse, A., Auer, H., Achouri, Y.,  
514 Dubois, C., Bondue, A., et al. (2014). Early lineage restriction in temporally distinct populations of  
515 Mesp1 progenitors during mammalian heart development. *Nat Cell Biol* 16, 829-840.
- 516 Lien, C.L., Wu, C., Mercer, B., Webb, R., Richardson, J.A., and Olson, E.N. (1999). Control of early  
517 cardiac-specific transcription of Nkx2-5 by a GATA-dependent enhancer. *Development* 126, 75-84.
- 518 Linask, K.K., Knudsen, K.A., and Gui, Y.H. (1997). N-cadherin-catenin interaction: necessary  
519 component of cardiac cell compartmentalization during early vertebrate heart development. *Dev*  
520 *Biol* 185, 148-164.
- 521 Liu, J., and Stainier, D.Y. (2012). Zebrafish in the study of early cardiac development. *Circ Res* 110,  
522 870-874.
- 523 Ma, Q., Zhou, B., and Pu, W.T. (2008). Reassessment of Isl1 and Nkx2-5 cardiac fate maps using a  
524 Gata4-based reporter of Cre activity. *Dev Biol* 323, 98-104.

- 525 Madisen, L., Zwingman, T.A., Sunkin, S.M., Oh, S.W., Zariwala, H.A., Gu, H., Ng, L.L., Palmiter,  
526 R.D., Hawrylycz, M.J., Jones, A.R., et al. (2010). A robust and high-throughput Cre reporting and  
527 characterization system for the whole mouse brain. *Nat Neurosci* 13, 133-140.
- 528 Marvin, M.J., Di Rocco, G., Gardiner, A., Bush, S.M., and Lassar, A.B. (2001). Inhibition of Wnt  
529 activity induces heart formation from posterior mesoderm. *Genes Dev* 15, 316-327.
- 530 Meijering, E., Dzyubachyk, O., and Smal, I. (2012). Methods for cell and particle tracking. *Methods*  
531 *Enzymol* 504, 183-200.
- 532 Meilhac, S.M., Esner, M., Kelly, R.G., Nicolas, J.F., and Buckingham, M.E. (2004a). The clonal origin  
533 of myocardial cells in different regions of the embryonic mouse heart. *Dev Cell* 6, 685-698.
- 534 Meilhac, S.M., Esner, M., Kerszberg, M., Moss, J.E., and Buckingham, M.E. (2004b). Oriented  
535 clonal cell growth in the developing mouse myocardium underlies cardiac morphogenesis. *J Cell*  
536 *Biol* 164, 97-109.
- 537 Mjaatvedt, C.H., Nakaoka, T., Moreno-Rodriguez, R., Norris, R.A., Kern, M.J., Eisenberg, C.A.,  
538 Turner, D., and Markwald, R.R. (2001). The outflow tract of the heart is recruited from a novel  
539 heart-forming field. *Dev Biol* 238, 97-109.
- 540 Moorman, A.F., Christoffels, V.M., Anderson, R.H., and van den Hoff, M.J. (2007). The heart-  
541 forming fields: one or multiple? *Philos Trans R Soc Lond B Biol Sci* 362, 1257-1265.
- 542 Moretti, A., Caron, L., Nakano, A., Lam, J.T., Bernshausen, A., Chen, Y., Qyang, Y., Bu, L., Sasaki, M.,  
543 Martin-Puig, S., et al. (2006). Multipotent embryonic *Isl1*<sup>+</sup> progenitor cells lead to cardiac, smooth  
544 muscle, and endothelial cell diversification. *Cell* 127, 1151-1165.
- 545 Muzumdar, M.D., Tasic, B., Miyamichi, K., Li, L., and Luo, L. (2007). A global double-fluorescent  
546 Cre reporter mouse. *Genesis* 45, 593-605.
- 547 Nonaka, S. (2009). Modification of mouse nodal flow by applying artificial flow. *Methods Cell*  
548 *Biol* 91, 287-297.
- 549 Nonaka, S., Shiratori, H., Saijoh, Y., and Hamada, H. (2002). Determination of left-right patterning  
550 of the mouse embryo by artificial nodal flow. *Nature* 418, 96-99.
- 551 Parchem, R.J., Moore, N., Fish, J.L., Parchem, J.G., Braga, T.T., Shenoy, A., Oldham, M.C., Rubenstein,  
552 J.L., Schneider, R.A., and Belloch, R. (2015). miR-302 Is Required for Timing of Neural Differentiation,  
553 Neural Tube Closure, and Embryonic Viability. *Cell Rep* 12, 760-773.
- 554 Prall, O.W., Menon, M.K., Solloway, M.J., Watanabe, Y., Zaffran, S., Bajolle, F., Biben, C., McBride,  
555 J.J., Robertson, B.R., Chaudhry, H., et al. (2007). An *Nkx2-5/Bmp2/Smad1* negative feedback loop  
556 controls heart progenitor specification and proliferation. *Cell* 128, 947-959.
- 557 Qyang, Y., Martin-Puig, S., Chiravuri, M., Chen, S., Xu, H., Bu, L., Jiang, X., Lin, L., Granger, A.,  
558 Moretti, A., et al. (2007). The renewal and differentiation of *Isl1*<sup>+</sup> cardiovascular progenitors are  
559 controlled by a Wnt/beta-catenin pathway. *Cell Stem Cell* 1, 165-179.
- 560 Ramsbottom, S.A., Sharma, V., Rhee, H.J., Eley, L., Phillips, H.M., Rigby, H.F., Dean, C., Chaudhry,  
561 B., and Henderson, D.J. (2014). *Vangl2*-regulated polarisation of second heart field-derived cells is  
562 required for outflow tract lengthening during cardiac development. *PLoS Genet* 10, e1004871.
- 563 Saga, Y., Hata, N., Kobayashi, S., Magnuson, T., Seldin, M.F., and Taketo, M.M. (1996). *MesP1*:  
564 a novel basic helix-loop-helix protein expressed in the nascent mesodermal cells during mouse  
565 gastrulation. *Development* 122, 2769-2778.
- 566 Saga, Y., Miyagawa-Tomita, S., Takagi, A., Kitajima, S., Miyazaki, J., and Inoue, T. (1999). *MesP1*  
567 is expressed in the heart precursor cells and required for the formation of a single heart tube.  
568 *Development* 126, 3437-3447.
- 569 Schindelin, J., Arganda-Carreras, I., Frise, E., Kaynig, V., Longair, M., Pietzsch, T., Preibisch, S.,  
570 Rueden, C., Saalfeld, S., Schmid, B., et al. (2012). Fiji: an open-source platform for biological-image  
571 analysis. *Nat Methods* 9, 676-682.
- 572 Sinha, T., Wang, B., Evans, S., Wynshaw-Boris, A., and Wang, J. (2012). Disheveled mediated planar  
573 cell polarity signaling is required in the second heart field lineage for outflow tract morphogenesis.  
574 *Dev Biol* 370, 135-144.

- 575 Spater, D., Abramczuk, M.K., Buac, K., Zangi, L., Stachel, M.W., Clarke, J., Sahara, M., Ludwig, A.,  
576 and Chien, K.R. (2013). A HCN4+ cardiomyogenic progenitor derived from the first heart field and  
577 human pluripotent stem cells. *Nat Cell Biol* 15, 1098-1106.
- 578 Stanley, E.G., Biben, C., Elefanty, A., Barnett, L., Koentgen, F., Robb, L., and Harvey, R.P. (2002).  
579 Efficient Cre-mediated deletion in cardiac progenitor cells conferred by a 3'UTR-ires-Cre allele of the  
580 homeobox gene Nkx2-5. *Int J Dev Biol* 46, 431-439.
- 581 Tirosch-Finkel, L., Zeisel, A., Brodt-Ivshitz, M., Shamai, A., Yao, Z., Seger, R., Domany, E., and  
582 Tzahor, E. (2010). BMP-mediated inhibition of FGF signaling promotes cardiomyocyte differentiation  
583 of anterior heart field progenitors. *Development* 137, 2989-3000.
- 584 Tyser, R.C., Miranda, A.M., Chen, C.M., Davidson, S.M., Srinivas, S., and Riley, P.R. (2016). Calcium  
585 handling precedes cardiac differentiation to initiate the first heartbeat. *Elife* 5.
- 586 Ueno, S., Weidinger, G., Osugi, T., Kohn, A.D., Golob, J.L., Pabon, L., Reinecke, H., Moon, R.T., and  
587 Murry, C.E. (2007). Biphasic role for Wnt/beta-catenin signaling in cardiac specification in zebrafish  
588 and embryonic stem cells. *Proc Natl Acad Sci U S A* 104, 9685-9690.
- 589 Waldo, K.L., Hutson, M.R., Ward, C.C., Zdanowicz, M., Stadt, H.A., Kumiski, D., Abu-Issa, R., and  
590 Kirby, M.L. (2005). Secondary heart field contributes myocardium and smooth muscle to the arterial  
591 pole of the developing heart. *Dev Biol* 281, 78-90.
- 592 Wu, S.M., Fujiwara, Y., Cibulsky, S.M., Clapham, D.E., Lien, C.L., Schultheiss, T.M., and Orkin, S.H.  
593 (2006). Developmental origin of a bipotential myocardial and smooth muscle cell precursor in the  
594 mammalian heart. *Cell* 127, 1137-1150.
- 595 Yang, S.L., Yang, M., Herrlinger, S., Liang, C., Lai, F., and Chen, J.F. (2015). MiR-302/367 regulate  
596 neural progenitor proliferation, differentiation timing, and survival in neurulation. *Dev Biol* 408,  
597 140-150.
- 598 Yuan, S., and Schoenwolf, G.C. (2000). Islet-1 marks the early heart rudiments and is asymmetri-  
599 cally expressed during early rotation of the foregut in the chick embryo. *Anat Rec* 260, 204-207.
- 600 Zaffran, S., Kelly, R.G., Meilhac, S.M., Buckingham, M.E., and Brown, N.A. (2004). Right ventricular  
601 myocardium derives from the anterior heart field. *Circ Res* 95, 261-268.

## 602 Videos

- 603 • Video 1: 3D reconstruction of the cardiac crescent at EHF stage, based on Nkx2.5cre R26tdtomato  
604 signal. Related to Figure 1A.
- 605 • Video 2: 3D reconstruction of Mouse HT formation, based on embryos immunostained for  
606 cTnnT. Five representative stages are represented. Related to Figure 1C-G.
- 607 • Video 3: 3D reconstruction of the FHF (green) and SHF (red). Based on Nkx2.5cre R26tdtomato  
608 embryos immunostained for cTnnT. The border between cTnnT-negative and cTnnT-positive  
609 cells can be visualised at the interface between the red and green domains. Related to Figure  
610 2B.
- 611 • Video 4: z-max projection of an Nkx.25crecre/+; R26mG/mt embryo at cc stage and time-lapse  
612 movie of the same embryo after 10h42mn of ex-vivo culture. Images are single optical sections  
613 and acquired every 1s (ss) (representative analysis from 3 mice). Related to Figure 4E.
- 614 • Video 5: Time-lapse movie of a Mesp1cre/+; R26tdtomato embryo from cc up to open HT  
615 stage (h:mm:ss) (representative analysis from 4 mice). Related to Figure 4F.
- 616 • Video 6: Same embryo as in Video 5. Images are z-max projection of 9 sections acquired every  
617 4um covering 36um (h:mm:ss) and allows visualisation of the inside of the cardiac lumen  
618 during HT formation. Related to Figure 4F'.
- 619 • Video 7: Time-lapse movie of an Nkx.25crecre/+; R26mG/mt embryo (h:mm:ss) (representa-  
620 tive analysis from 2 mice). Related to Figure 4G-G'.
- 621 • Video 8: Brightfield time-lapse movie of a wt embryo, from cc stage showing the differentiation,  
622 contractility of the cardiomyocytes, and formation of the cardiac lumen. Images are acquired  
623 every 1mn (h:mm:ss) (representative analysis from 2 mice).

- 624 • Video 9: Time-lapse movie sequences of Nkx2.5eGFP embryos from Early Bud/E7.5 stage  
625 (h:mm:ss) (representative analysis from 2 mice). Related to Figure 4-figure supplement 1A.
- 626 • Video 10: Time-lapse movie sequences of Nkx2.5eGFP embryos from cc to Hemi-tube stage  
627 (h:mm:ss) (representative analysis from 3 mice). Related to Figure 4H.
- 628 • Video 11: Time-lapse movie sequences of Nkx2.5eGFP embryos from transversal HT to open  
629 HT stage (h:mm:ss) (representative analysis from 3 mice). Related to Figure 4-figure  
630 supplement 1B.
- 631 • Video 12: Cell tracks in 3D represented with Imaris during stages cardiac differentiation  
632 takes place -from EHF onwards-. Cells are represented as green spheres if their GFP level  
633 is increasing and goes above a threshold value defined as the median intensity value of all  
634 the tracked cells at the last time point; and as red spheres when it remains below (h:mm:ss)  
635 (representative analysis from 3 mice). Related to Figure 5A.
- 636 • Video 13: Cell tracks in 3D represented with Imaris during stages the open HT forms. Cells are  
637 represented as green spheres if their GFP level are above a threshold value defined as the  
638 median intensity value of all the tracked cells at the last time point; and as red spheres when  
639 they remains below (h:mm:ss) (representative analysis from 4 mice). Related to Figure 6A.
- 640 • Video 14: Time-lapse movie of an RNApolIII<sup>Cre/+</sup>; R26tdtomato; Nkx2.5eGFP embryo during  
641 the stages at which the transversal HT transforms into a open HT (h:mm:ss). (Latter half) 3D  
642 reconstruction at three time points based of the Nkx2.5eGFP signal (green) and red-labeled  
643 cells located in the splanchnic mesoderm. Related to Figure 7A.
- 644 • Video 15: Time-lapse movie of an Isl1<sup>Cre/+</sup>; R26tdtomato; Nkx2.5eGFP embryo (h:mm:ss)  
645 (representative analysis from 3 mice). (representative analysis from 2 mice) Related to  
646 Figure 8A.
- 647 • Video 16: Same embryo shown in Video 14 zoomed in at the level of the splanchnic mesoderm  
648 (h:mm:ss). Related to Figure 8C.
- 649 • Video 17: 3D rendering of an Isl1<sup>Cre/+</sup>; R26tdtomato; Nkx2.5eGFP embryo at transversal HT  
650 stage. Related to Figure 8E.
- 651 • Video 18: 3D rendering of an Isl1<sup>Cre/+</sup>; R26tdtomato; Nkx2.5eGFP embryo at linear HT stage.  
652 Related to Figure 8F.

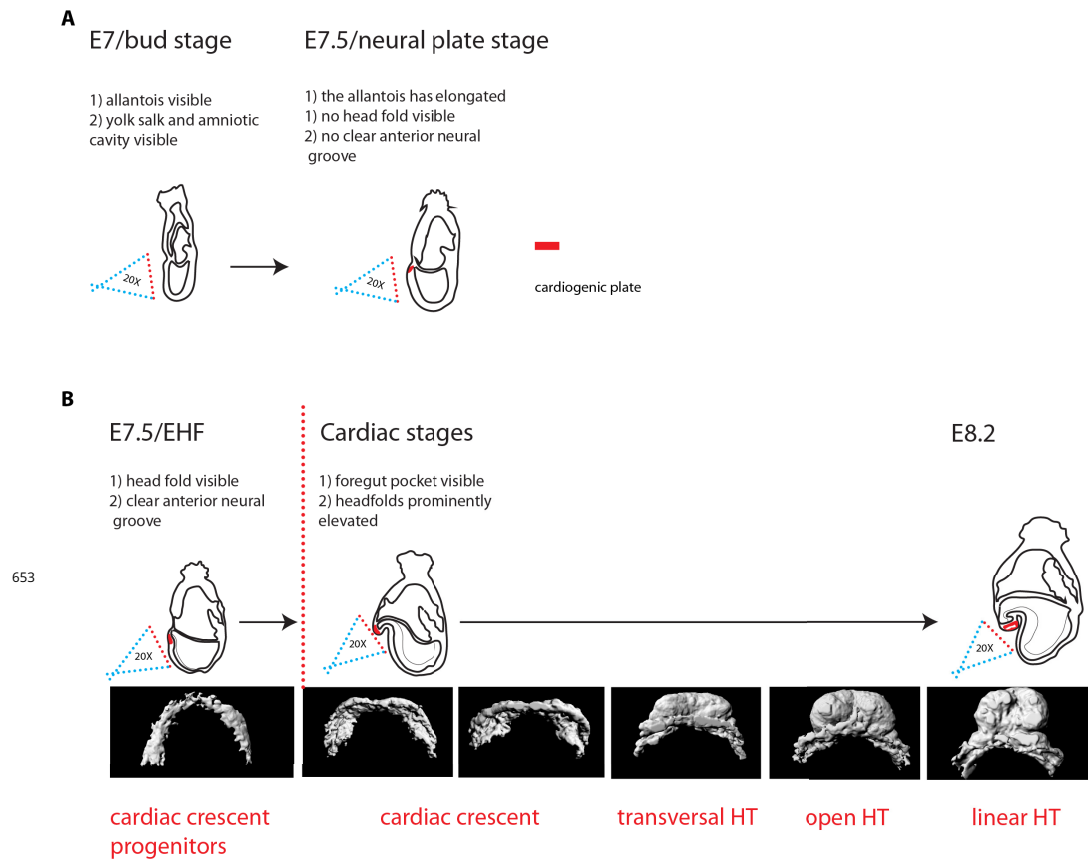

**Figure 1-Figure supplement 1.** Criteria for staging Embryos. We determined the developmental stage of embryos based on morphological landmark(Downs and Davies, 1993; Kirstie A. Lawson, 2016). (A) At bud stage/E7, a small allantois bud is visible. At neural pate stage/E7.5, the allantois is larger and project into the yolk sack cavity. The anterior neuroectoderm is enlarged. (B) At EHF/E7.5, the neural plate starts to form the head fold. During somitogenesis, a clearly visible foregut pocket appears and the head folds are located dorsally and anteriorly to the cardiac primordium. The cc has differentiated. It transforms successively into the transversal HT, the open HT and the linear HT closed dorsally and a prominent outflow/RV formed.

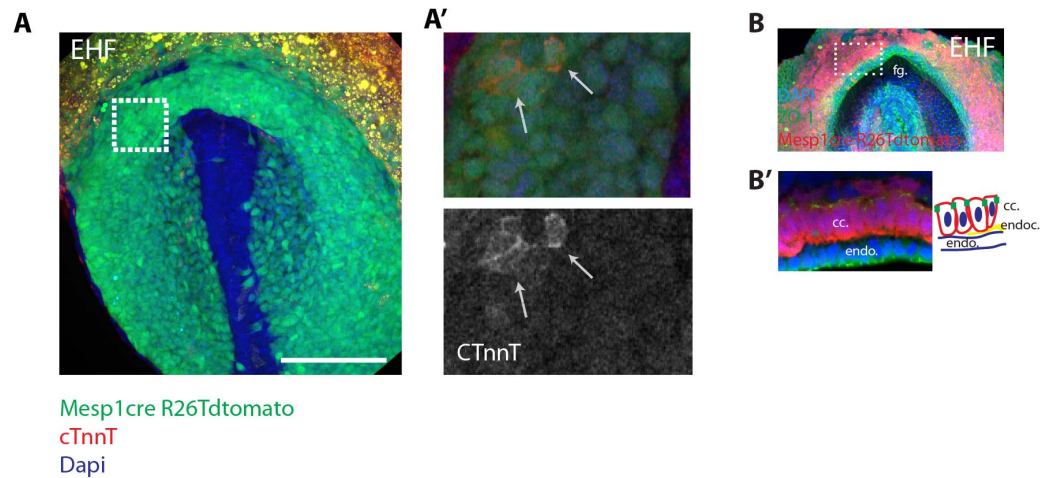

**Figure 1-Figure supplement 2.** Faint cTnnT signal starts to be detected at EHF stage in apico-basally polarised cc cells. (A) Mesp1cre/+; R26tdtomato embryo at EHF stage -labeling the mesoderm (green)- immunostained against cTnnT (red) and Dapi (blue). Note that the embryo is at a slightly more advanced developmental stage than those shown in (Figure 1B) because the foregut pocket is more invaginated. (A') White inset in (A). Faint cTnnT signal (red) in few mesodermal cells (arrows) can be detected. (B-B') Mesp1cre/+; R26tdtomato embryo showing the mesoderm in red and immunostained against the tight junction component zona-occludens-1 (ZO-1) (green) and Dapi (blue). The cc cells (as seen in transversal sections) have an AB polarised epithelial morphology. Scale bars: 150  $\mu$ m



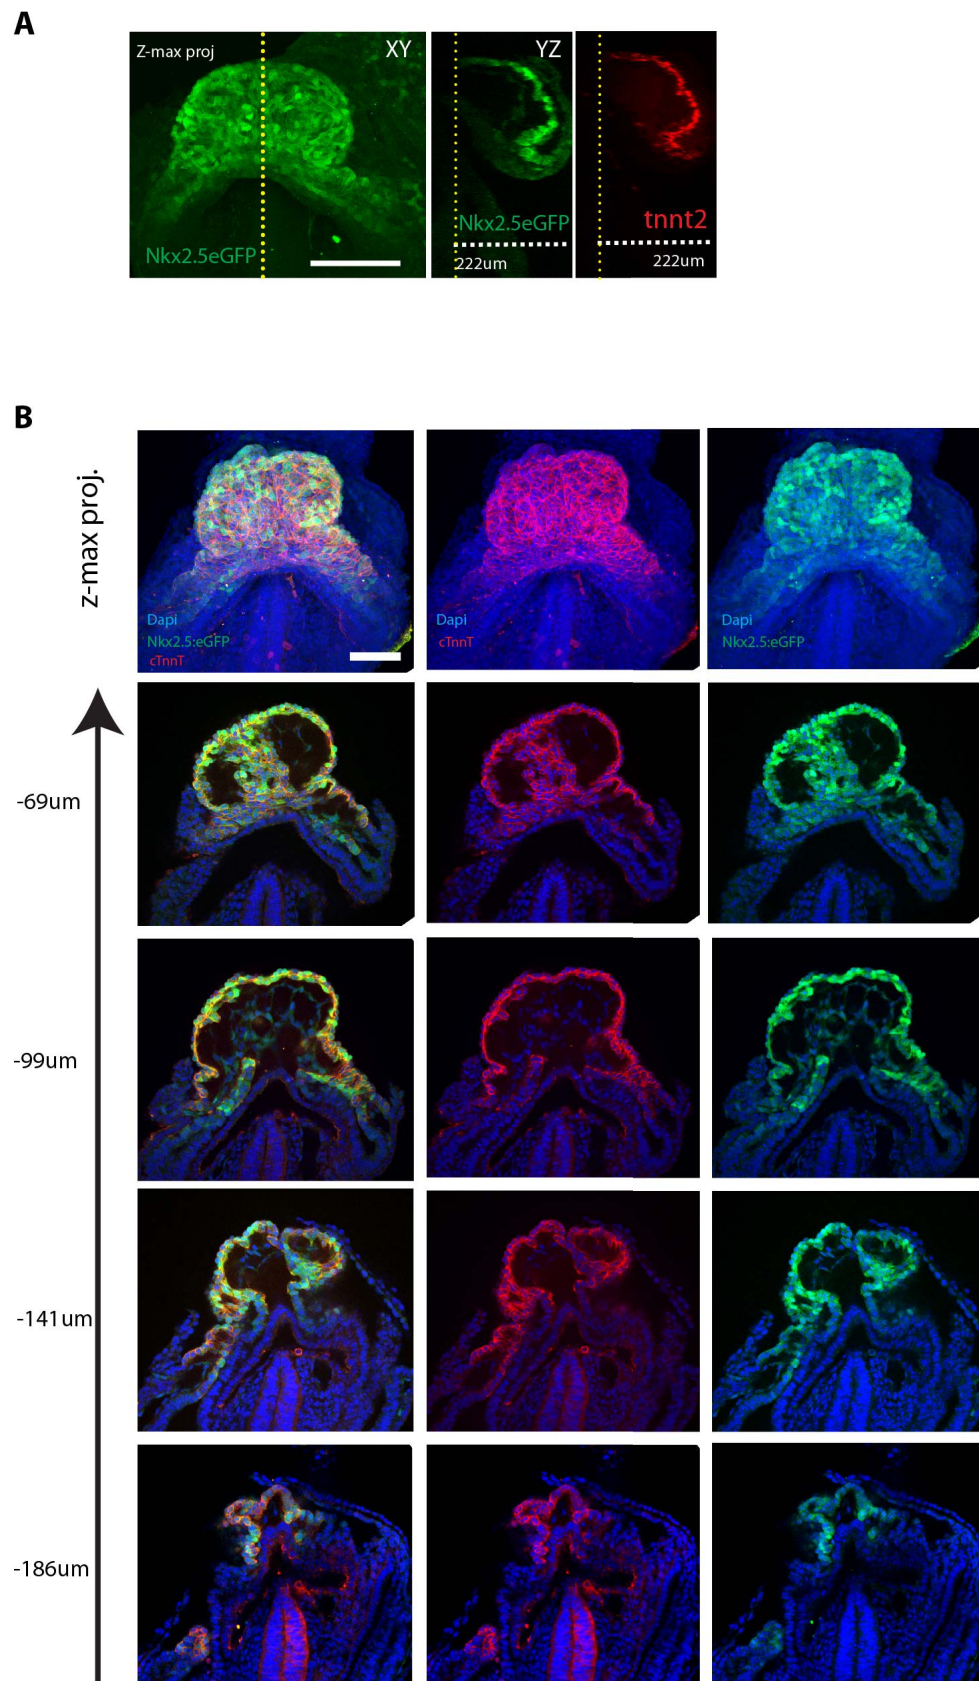

**Figure 3-Figure supplement 1.** The Nkx2.5eGFP and cTnnT labelling at different z-level. (A) z-maximum projection and yz view of a Nkx2.5-eGFP embryo immunostained against cTnnT showing overlap between eGFP signal and cTnnT localisation in the z dimension. (B) z-maximum projection and optical sections at different z-level of an Nkx2.5-eGFP embryo, immunostained for cTnnT (red) and Dapi (blue), showing overlapping expression of GFP and cTnnT signal. Scale bars: 100 µm.

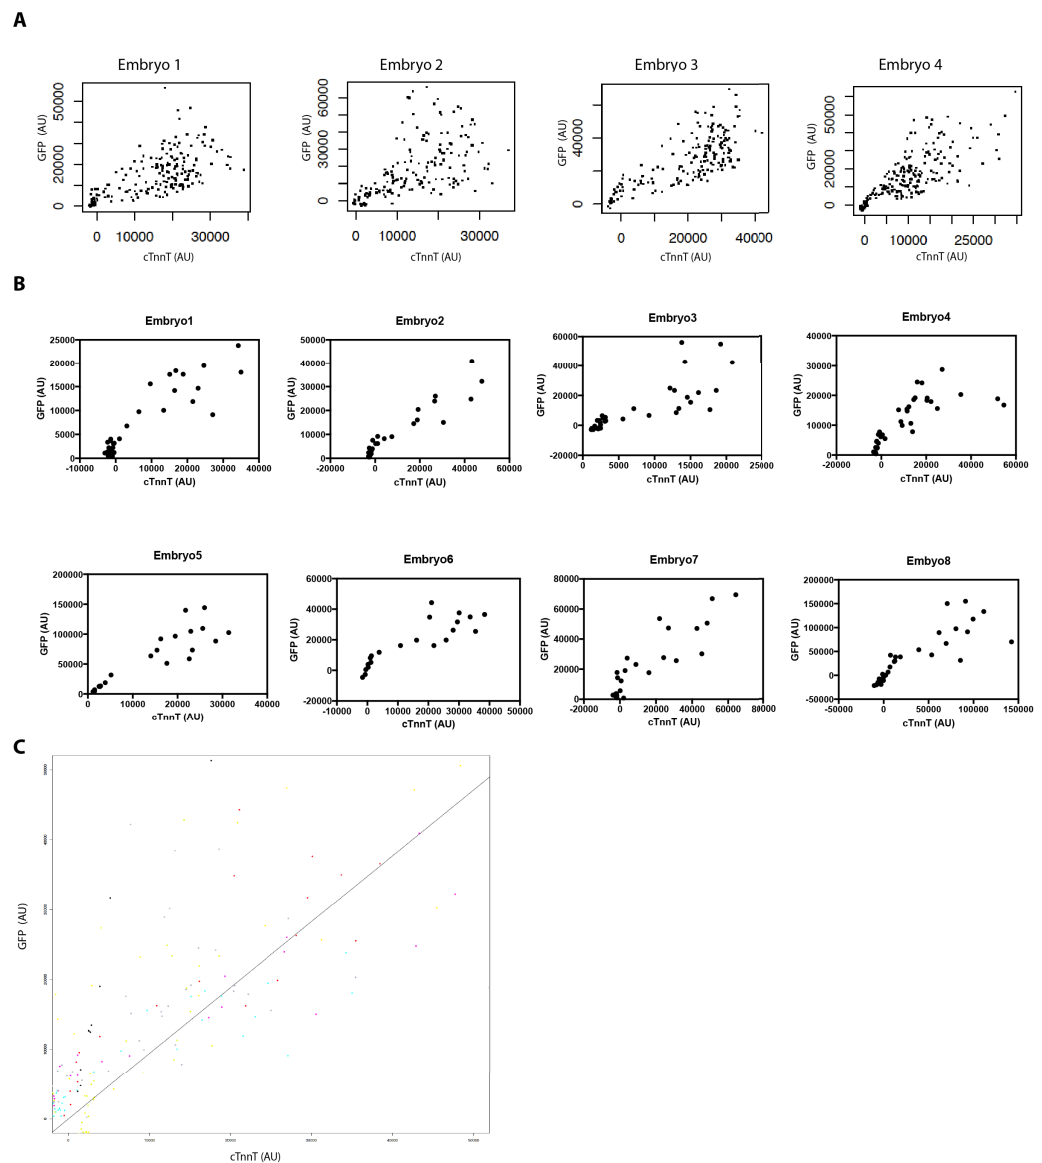

**Figure 3-Figure supplement 2.** High GFP levels are detected in cTnnT-positive cells. (A,B) Normalized GFP and cTnnT mean level for single segmented cell (A) located in the FHF and SHF and (B) located at the boundary zone between the FHF and SHF (n=130 cells analysed from 8 embryos). (C) Linear mixed-effects model to find the relationship between the background subtracted GFP and cTnnT levels adjusted by embryo for cell located at the boundary between the FHF and SHF ( $GFP=0.94*cTnnT$ ,  $R^2=0.77$ ,  $p<2.2e-16$ ). Each dot represents a single segmented cell. Cells are being considered positive for cTnnT when their mean intensity value is above 0. Note that small GFP signal can be detected in the cTnnT-negative SHF cells. Scale bars: 100  $\mu$ m.

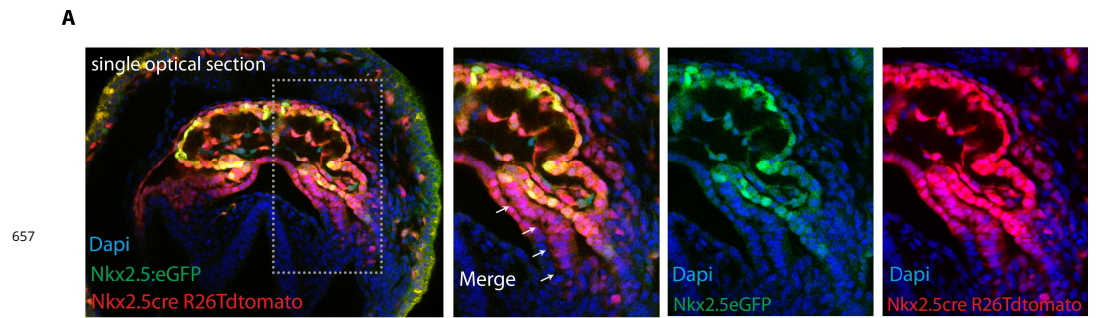

**Figure 3-Figure supplement 3.** Nkx2.5Cre genetic tracing labels both the FHF and SHF (A) The GFP expression of the Nkx2.5-eGFP reporter does not fully overlap with tdtomato expression pattern in Nkx2.5cre/+; R26tdtomato/+; Nkx2.5eGFP embryos at the level of the splanchnic mesoderm/SHF. Scale bars: 100  $\mu$ m.

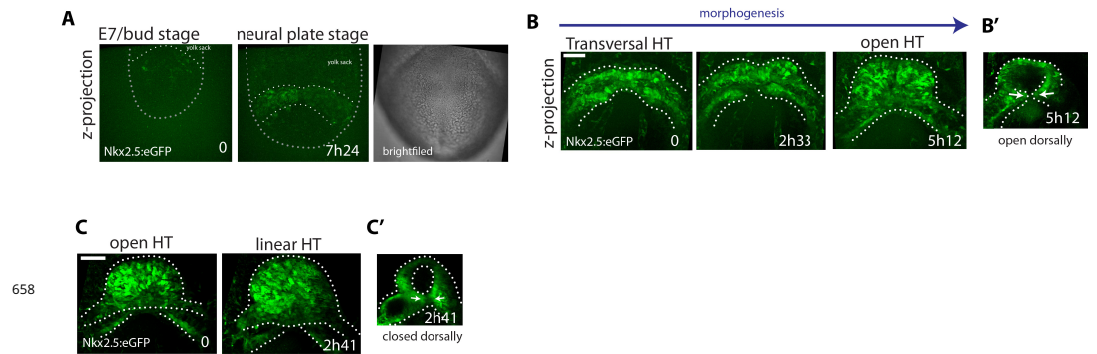

**Figure 4-Figure supplement 1.** Live-imaging of Nkx2.5eGFP reporter line. (A-D) Time-lapse movie sequences of Nkx2.5eGFP embryos from Early Bud (A), transversal HT (B) and open HT stage (C). Images are z-max projection of 75 sections acquired every 14  $\mu$ m covering 300  $\mu$ m in (A), 55 sections acquired every 6  $\mu$ m covering 330  $\mu$ m in (B) and 59 sections acquired every 5  $\mu$ m covering 295  $\mu$ m in (D). (B' and C'): z-max projection covering 132  $\mu$ m (C') and 60  $\mu$ m (D') showing the dorsal opening and the dorsal closure of the HT at the last time points. See also Videos 9 and 11.

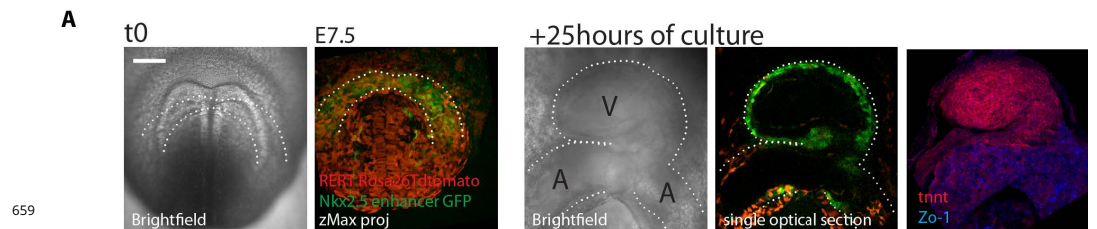

**Figure 4-Figure supplement 2.** Embryos can be cultured and imaged under the 2-photon microscope for up to 24hours.(A) RERT; R26tdtomato; Nkx2.5eGFP embryo. Starting culture at E7.5, by the end of the 25 hours ex-vivo culture, the HT has formed and looped (experiment repeated 3 times independantly). The embryo was subsequently fixed and immunostained for cTnnT (red) and ZO-1 (blue). V: prospective left ventricle, A: prospective atria. Scale bars: 100  $\mu$ m

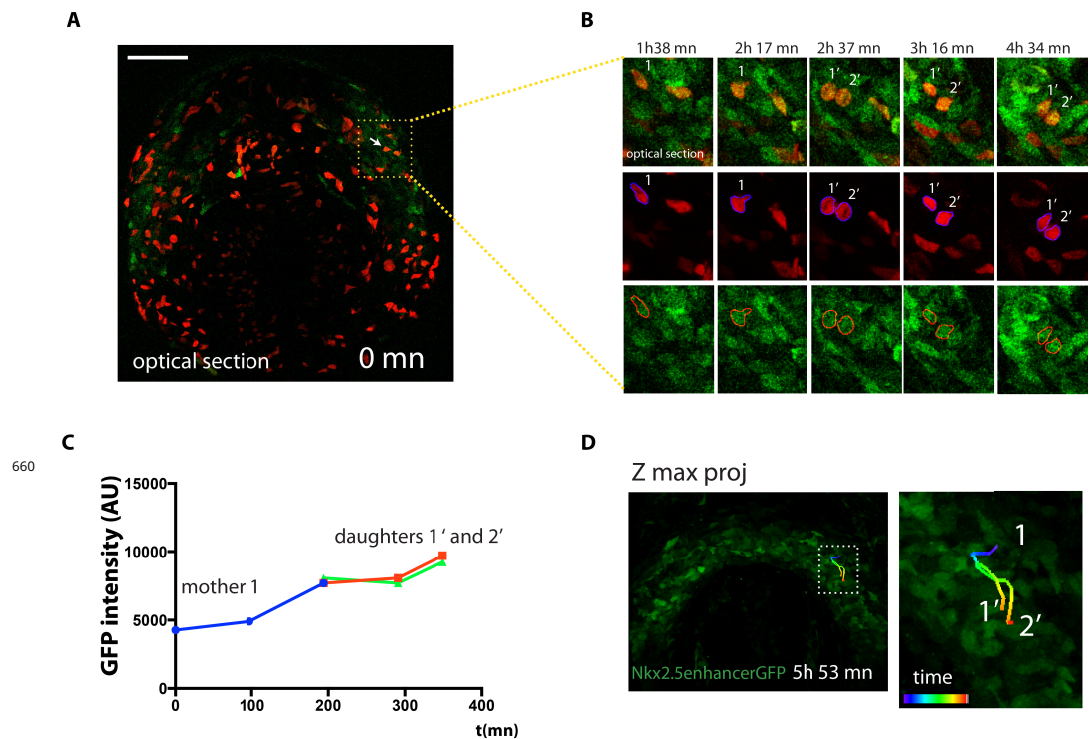

**Figure 5-Figure supplement 1.** Cells divide during cardiac differentiation. (A-C) Time-lapse movie of a dividing red-labelled tracked cell. Images are single optical sections (same dataset as shown in Figure 4A). The dividing red-labelled cell and daughter cells are segmented and mean GFP level is measured. (D) Full 4D track of the dividing cell showing close localization of the progeny in the cardiac crescent. Scale bars: 100  $\mu$ m

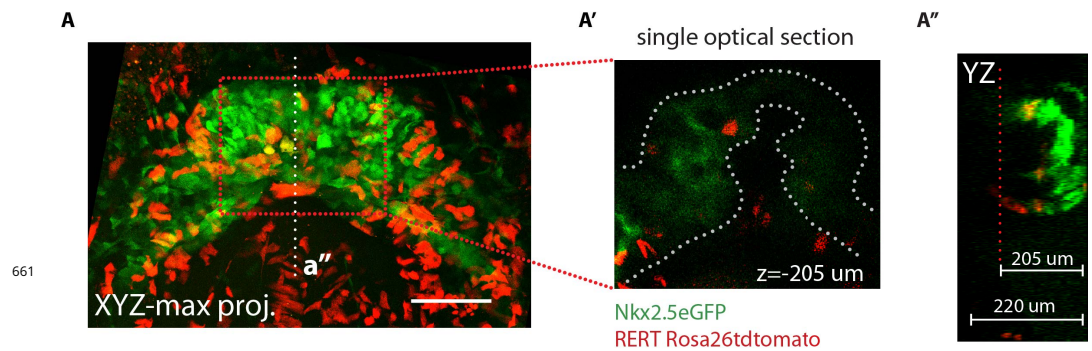

**Figure 8-Figure supplement 1.** GFP level in deeper z level cannot be accurately quantified.(A-A'') R26tdtomato; Nkx2.5eGFP embryo at transversal HT stage. (A) z-maximum projection of 44 sections acquired every 5  $\mu$ m and covering 220  $\mu$ m. (A') single optical section at z=205  $\mu$ m and showing weak GFP level corresponding to the red dotter inset in (A). (A'') yz view at the corresponding white dotted line shown in (A).
